# Supplementary material for: Whole exome sequencing reveals NOTCH1 mutations in anaplastic large cell lymphoma and points to Notch both as a key pathway and a potential therapeutic target
Source: PubMed Central journal article supplement — Haematologica. 2020 Apr 23;106(6):1693–704. doi: 10.3324/haematol.2019.238766 (PMC8168516; doi:10.3324/haematol.2019.238766), 2020-04-23
Supplement: 2019_238766_LAROSE_SUPPL.pdf [file 2019_238766_LAROSE_SUPPL.pdf]

## Whole exome sequencing reveals *NOTCH1* mutations in anaplastic large cell lymphoma and points to Notch both as a key pathway and a potential therapeutic target

Hugo Larose,<sup>1,2</sup> Nina Prokoph,<sup>1,2</sup> Jamie D. Matthews,<sup>1</sup> Michaela Schleder,<sup>3</sup> Sandra Högler,<sup>4</sup> Ali F. Alsulami,<sup>5</sup> Stephen P. Ducray,<sup>1,2</sup> Edem Nuglozeh,<sup>6</sup> Mohammad Feroze Fazaludeen,<sup>7</sup> Ahmed Elmouna,<sup>6</sup> Monica Ceccon,<sup>2,8</sup> Luca Mologni,<sup>2,8</sup> Carlo Gambacorti-Passerini,<sup>2,8</sup> Gerald Hoefler,<sup>9</sup> Cosimo Lobello,<sup>2,10</sup> Sarka Pospisilova,<sup>2,10,11</sup> Andrea Janikova,<sup>2,11</sup> Wilhelm Woessmann,<sup>2,12</sup> Christine Damm-Welk,<sup>2,12</sup> Martin Zimmermann,<sup>13</sup> Alina Fedorova,<sup>14</sup> Andrea Malone,<sup>15</sup> Owen Smith,<sup>15</sup> Mariusz Wasik,<sup>2,16</sup> Giorgio Inghirami,<sup>17</sup> Laurence Lamant,<sup>18</sup> Tom L. Blundell,<sup>5</sup> Wolfram Klapper,<sup>19</sup> Olaf Merkel,<sup>2,3</sup> G. A. Amos Burke,<sup>20</sup> Shahid Mian,<sup>6</sup> Ibraheem Ashankyty,<sup>21</sup> Lukas Kenner<sup>2,3,22</sup> and Suzanne D. Turner<sup>1,2,10</sup>

<sup>1</sup>Department of Pathology, University of Cambridge, Cambridge, UK; <sup>2</sup>European Research Initiative for ALK Related Malignancies (ERIA; [www.ERIALCL.net](http://www.ERIALCL.net)); <sup>3</sup>Department of Pathology, Medical University of Vienna, Vienna, Austria; <sup>4</sup>Unit of Laboratory Animal Pathology, University of Veterinary Medicine Vienna, Vienna, Austria; <sup>5</sup>Department of Biochemistry, University of Cambridge, Tennis Court Road, Cambridge, UK; <sup>6</sup>Molecular Diagnostics and Personalised Therapeutics Unit, Colleges of Medicine and Applied Medical Sciences, University of Ha'il, Ha'il, Saudi Arabia; <sup>7</sup>Neuroinflammation Research Group, Department of Neurobiology, A.I Virtanen Institute for Molecular Sciences, University of Eastern Finland, Finland; <sup>8</sup>University of Milano-Bicocca, Monza, Italy; <sup>9</sup>Diagnostic and Research Institute of Pathology, Medical University of Graz, Graz, Austria; <sup>10</sup>Center of Molecular Medicine, CEITEC, Masaryk University, Brno, Czech Republic; <sup>11</sup>Department of Internal Medicine – Hematology and Oncology, University Hospital Brno, Czech Republic; <sup>12</sup>University Hospital Hamburg-Eppendorf, Pediatric Hematology and Oncology, Hamburg, Germany; <sup>13</sup>Department of Pediatric Hematology/Oncology and Blood Stem Cell Transplantation, Hannover Medical School, Hannover, Germany; <sup>14</sup>Belarusian Center for Pediatric Oncology, Hematology and Immunology, Minsk, Belarus; <sup>15</sup>Our Lady's Children's Hospital, Crumlin, Ireland; <sup>16</sup>Perelman School of Medicine, Philadelphia, PA, USA; <sup>17</sup>Department of Pathology and Laboratory Medicine, Cornell University, New York, NY USA; <sup>18</sup>Institut Universitaire du Cancer Toulouse, Oncopole et Université Paul-Sabatier, Toulouse, France; <sup>19</sup>Department of Pathology, Hematopathology Section, UKSH Campus Kiel, Kiel, Germany; <sup>20</sup>Department of Paediatric Oncology, Addenbrooke's Hospital, Cambridge, UK; <sup>21</sup>Department of Medical Technology Laboratory, College of Applied Medical Sciences, King Abdulaziz University, Jeddah, Saudi Arabia and <sup>22</sup>Ludwig-Boltzmann Institute for Cancer Research, Vienna, Austria

©2021 Ferrata Storti Foundation. This is an open-access paper. doi:10.3324/haematol.2019.238766

Received: September 19, 2019.

Accepted: April 9, 2020.

Pre-published: April 23, 2020.

Correspondence: SUZANNE D. TURNER - [sdt36@cam.ac.uk](mailto:sdt36@cam.ac.uk)

## Supplemental Material

### Supplemental Methods

RNA Extraction and RT-qPCR

Sanger Sequencing

Western Blot

Modelling Molecular Structure and Predicting the Impact of Mutations

Bioinformatics Analysis

Gene Set Enrichment Analysis

ChIP-qPCR

Generation of Crizotinib Resistant ALCL Cell Lines

ChIP-Seq

Microarray Data Analysis

Compounds, Cell Lines and Plasmids

Cellular Proliferation and Apoptosis

Site-Directed Mutagenesis

Lentiviral Production and Transduction

### Supplemental Figures

**Supplementary Figure 1.** Schematic representation of patient cohorts for which WES data were generated and analysed.

**Supplementary Figure 2.** Further details regarding WES bioinformatic analysis.

**Supplementary Figure 3.** Modelling of the NOTCH1-JAG1 interaction.

**Supplementary Figure 4.** ChIP-seq demonstrating binding of STAT3 at the *notch1* promoter region.

**Supplementary Figure 5.** Changes in gene expression upon GSI treatment in T-ALL.

**Supplementary Figure 6.** Proliferation of cells lines when treating with GSI 1.

**Supplemental Figure 7.** Quality Controls for bioinformatic processing.

### **Supplemental Tables**

**Supplementary Table S1:** Characteristics of the patient tumour samples obtained from the Children's Cancer and Leukaemia Group (CCLG) tissue bank for which WES was conducted or whose WES data was downloaded from the Sequence Read Archive (SRP044708).

**Supplementary Table S2:** Characteristics of the 78 patient samples that were employed to validate the presence of Notch1 variants in a larger patient population.

**Supplementary Table S3:** Characteristics of the 89 patient tissues that were stained for NOTCH1 expression on the tissue microarray, from which clinical data allowed computation of the 10-year EFS.

**Supplementary Table S4:** WES details for the three different patient sample cohorts, including sample names and coverage detail. The Childrens' Cancer and Leukaemia Group (CCLG), is a UK-based charity and tissue bank.

**Supplementary Table S5:** Detailed list of antibodies used in this study.

**Supplementary Table S6:** Detailed list of variants found in at least 10% of the WES cohort.

**Supplementary Table S7 (Excel file):** Details of copy number variations detected in more than 1 patient. Sheet 1: Copy number altered autosomal regions detected in patient samples. Sheet 2: Genes involved in recurrent copy number gains. Sheet 3: Genes involved in recurrent copy number losses.

**Supplementary Table S8:** Details of the mutations found in the NOTCH1 pathway by GSEA.

**Supplementary Table S9:** Clinical data pertaining to the validation cohort.

**Supplementary Table S10:** Detailed list of oligos used in this study.

**Supplementary Table S11:** Cell line description.

**Supplementary Table S12:** Detailed list of plasmids used in this study.

### **Supplemental Methods**

#### **RNA Extraction and RT-qPCR**

RNA was extracted using a standard Phenol/Chloroform protocol using TRI reagent (Sigma-Aldrich) before DNA degradation with TURBO DNase (Thermo Fisher Scientific), following which 2 µg of total RNA was reverse transcribed into cDNA using SuperScript III Reverse Transcriptase (ThermoFisher

Scientific). SYBR-Green qPCR analysis was then performed using the QuantStudio™ 6 Flex Real-Time PCR System in accordance with the manufacturer's instructions.

### **Sanger Sequencing**

PCR was used to amplify the region of interest (for oligo sequences see Supplementary Table S10) after which primer dimers were removed using ExoSAP-IT (Thermo Scientific), fragments of interest were labelled using the BigDye Terminator v3.1 Cycle Sequencing Kit (Thermo Scientific) and excess removed using DynaBeads (Thermo Scientific), all according to the manufacturer's instructions. Finally, samples were sequenced using an ABI3730 Sequencer (48 capillaries) and analysed using SeqScanner 2 software. Samples were sequenced in duplicates when variant validation was not immediately evident.

### **Western Blot**

Cells were lysed in Pierce RIPA buffer (Thermo Scientific) supplemented with Halt Protease and Phosphatase Inhibitor Cocktail (Thermo Scientific). Laemmli buffer with a 5% final concentration of 2-mercaptoethanol was added to the samples, which were then boiled and proteins separated by TGX 10% Acrylamide Gel (Bio-Rad, Hercules, California, US). Proteins were transferred to a 0.45 µm PVDF membrane (Immobilon, Burlington, Massachusetts, US) using the BioRad Trans-Blot Turbo system in 1X Transfer Buffer (Bio-Rad) for 7 minutes at 25 V and 1.3 A. Membranes were then incubated in 5% BSA (Acros Organics, Hampton, New Hampshire, US) in TBST before exposing to the indicated antibodies (Supplementary Table S5) diluted in 3% BSA in TBST and finally visualised with HRP substrate (Millipore) using an LAS4000 imager (Fujifilm, Minato, Japan).

### **Modelling Molecular Structure and Predicting the Impact of Mutations**

Multiple templates from the Protein Data Bank were selected for the extracellular (PDB IDs: 4XL1, 4XBM, 5MWB, 4D90) and intracellular domains (PDB IDs: 1YMP, 1OT8) of NOTCH1 using FUGUE<sup>1</sup>. The model was derived using MODELLER, which was used to predict the structure of the mutant protein.

The same process was used to build the JAG1 model (PDB ID: 2VJ2). SDM<sup>2</sup>, DynaMut<sup>3</sup> and mCSM<sup>4</sup> were used to predict the impact of mutations on NOTCH1 stability and NOTCH1 -ligand interaction.

### **Bioinformatics Analysis**

Paired-end sequencing data from 7 previously analysed ALK+ ALCL samples (with matched peripheral blood) were retrieved from the Sequence Read Archive (SRP044708)<sup>5</sup>. Reads from these and the 18 *de novo* sequenced samples were first analysed using FastQC for quality control. Reads were trimmed to remove nucleotide calls with a Quality score inferior to 30. Reads with a length of less than 50 nt were removed. The Burrows-Wheeler Alignment algorithm ('bwa mem' version 0.7.12-5) was used to align reads to the reference sequence of the human genome (version hg38), which was also indexed using the Burrows-Wheeler alignment tool using default algorithm settings. Aligned files were then sorted and indexed (SAMtools v1.4), after which duplicate reads were removed and reads around known InDel loci were realigned (using Picard's 'MarkDuplicates', 'RealignerTargetCreator' and 'IndelRealigner' v2.5.0), again using default algorithm settings. The Coverage of the ensuing files were computed, and is displayed in Supplementary Table S4. SNVs (Single-Nucleotide Variants) were called using CaVEMan<sup>6</sup> (version 1.9.5) and InDels (Insertions and Deletions) using Pindel<sup>7</sup> (version 0.2.5b8). InDels on all chromosomes were called, and the same reference genome as above was used. A configuration file containing the required data (sample type and insert size) is required, as detailed in the software manual. All files were called in parallel to increase call accuracy. With respect to CaVEMan, samples were called (where possible) against their peripheral blood counterparts to screen out germline variants. CaVEMan requires the same reference genome, along with a reference file containing regions of the human genome to ignore – a file was compiled using all the intergenic regions as determined by the University of California Santa Cruz (UCSC) Genomics Institute. Output files of CaVEMan and Pindel were concatenated into a single file.

Variants were annotated using Annotvar's<sup>8</sup> 'table\_annotvar.pl' function (both SNVs and InDels), against the human genome hg38 build as a reference. The variants were annotated against the refGene (build

77), Cosmic (build 78), AVSNP (build 147) and dbSNP (build 148) databases. Variants were also annotated against a number of variant prediction databases: SIFT<sup>9</sup>, Polyphen<sup>10</sup>, LRT<sup>11</sup>, MutationTaster<sup>12</sup>, MutationAssessor<sup>13</sup>, FATHMM<sup>14</sup>, PROVEAN<sup>15</sup>, MetaSVM<sup>16</sup>, MetaLR<sup>16</sup>, CADD<sup>17</sup>, dbSNP, 1000Genome (phase 3 release), ExAc and Clinvar. Variants annotated as part of an intronic, intergenic, a UTR or immediately upstream or downstream of a gene were filtered out. Synonymous SNVs were also filtered out. Highly variable genes with low likelihood of pathogenicity were also screened out at this stage, using published literature<sup>18</sup>. Variants contained in any of the 11 matched peripheral blood samples were filtered out from all samples. Variants identified as present in the population at a frequency of >0.1% as determined by either dbSNP or the 1000 Genome project were also filtered out. Finally, variants were screened based on pathogenicity, using annotated variant effect prediction scores. Variants predicted to be damaging by both MetaSVM and MetaLR were retained, while those predicted to be tolerated were filtered out. For variants not annotated by MetaSVM/MetaLR, custom scores combining 8 Variant Effect Prediction software (SIFT, Polyphen, LRT, MutationTaster, MutationAssessor, FATHMM, PROVEAN, CADD) were derived: scores from each software were translated to a 0-1 scale and averaged out, following which variants with scores in the ten most damaging percentiles were retained.

To exclude batch effects, the number of post-filtering somatic variants per patient was analysed (looking at the sequencing cohort to which they pertain (i.e. ALCL99 samples, CCLG tissue bank or the published dataset<sup>5</sup>), so the differences between samples was independent of these variables (Figure S7A). Similarly, the proportion of variant type was independent of the sequencing cohort (Figure S7B). Copy-number variation was studied using CNVkit 0.94<sup>19</sup>.

### **Gene Set Enrichment Analysis**

All genes which were mutated in at least two of the 25 patients were included in Gene Set Enrichment Analysis. Two different software programmes were used; DAVID<sup>20</sup> for protein domains, and

Reactome<sup>21</sup> for pathway analysis. Reactome analysis combined 5 different databases: IPA (Qiagen), PantherDB<sup>22</sup>, KEGG<sup>23</sup> and Reactome's own database. Analysis of protein domains using DAVID employed four different databases, GO<sup>24</sup>, Seq-Feat (National Center for Biotechnology Information, US), SMART<sup>25</sup> and InterPro<sup>26</sup>. The number of databases in which each pathway or domain was found to be enriched was then displayed along with *p*-values and the size of the network using ggplot2 in R.

### ChIP-qPCR

ChIP-qPCR analysis for NOTCH1 and IRF4 was performed on  $1 \times 10^7$  ALCL cells per sample using an anti-STAT3 or anti-GFP antibody (Supplementary Table S5). Following treatment with 1000 nM crizotinib or DMSO for 3 hrs in growth medium,  $1 \times 10^7$  cells were fixed with 0.75% formaldehyde for 15 mins with orbital shaking at room temperature. Subsequently, glycine was added to a final concentration of 125 nM and incubated for 5 mins at room temperature. Next, cells were washed twice with cold PBS, collected by centrifugation and flash frozen in dry ice/isopropanol before storage at  $-80^\circ\text{C}$  until use. Cell pellets were lysed in 650  $\mu\text{L}$  ChIP lysis buffer (50 mM HEPES-KOH pH7.5, 140 mM NaCl, 1 mM EDTA pH8, 1% Triton X-100, 0.1% Sodium Deoxycholate, 0.1% SDS) supplemented with complete™ Mini EDTA-free Protease Inhibitor Cocktail (Roche, Basel, Switzerland) per  $2 \times 10^7$  cells, followed by sonication for a total of 10 mins with 30 sec pulses on, followed by 30 sec off. Immunoprecipitation reactions were performed overnight with 3  $\mu\text{g}$  STAT3 or GFP antibodies at  $4^\circ\text{C}$ . Next, antibodies and chromatin were captured for 2 hrs at  $4^\circ\text{C}$  using 50  $\mu\text{L}$  of Protein G Dynabeads (Thermo Scientific) per sample. Beads were first washed three times with low salt buffer (0.1% SDS, 1% Triton X-100, 2 mM EDTA, 20 mM Tris-HCl pH 8.0, 150 mM NaCl), followed by three washes with high salt buffer (0.1% SDS, 1% Triton X-100, 2 mM EDTA, 20 mM Tris-HCl pH 8.0, 500 mM NaCl), two washes with LiCl wash buffer (0.25 M LiCl, 1% NP-40, 1% Sodium Deoxycholate, 1 mM EDTA, 10 mM Tris-HCl pH 8.0) and two final washes with TE buffer (10 mM Tris pH 8.0, 1 mM EDTA). DNA was eluted with 200  $\mu\text{L}$  elution buffer (1% SDS, 100mM  $\text{NaHCO}_3$ ), RNA was digested using 2  $\mu\text{L}$  RNase A (10 mg/mL, Roche) at  $37^\circ\text{C}$  for 30 mins, before cross-links were reversed at  $65^\circ\text{C}$  for 2 hrs with 2  $\mu\text{L}$  proteinase K (20 mg/mL,

Thermo Scientific). De-crosslinked DNA was purified with a Zymo DNA Clean and Concentrator-5 kit according to the manufacturer's instructions (Zymo research, Cambridge, UK). ChIP and input DNA were analyzed with SYBR-Green qPCR analysis performed using a QuantStudio™ 6 Flex Real-Time PCR System in accordance with the manufacturer's protocol using qPCR primers as shown in Table S10.

### **Generation of Crizotinib Resistant ALCL Cell Lines**

Crizotinib resistant Karpas-299, SUP-M2, SUDHL-1 and DEL cell lines were established as described previously<sup>27</sup>. Briefly, ALCL cells were seeded at approximately  $0.5 \times 10^6$  cells/ml before Crizotinib was added at a concentration of 50 nM, which was replaced every 48-72 hrs. After every second passage, the concentration of Crizotinib was increased in half-log intervals. The maximum concentrations of Crizotinib reached for Karpas-299, SUP-M2, DEL and SU-DHL1 cell lines were: 0.6  $\mu$ M, 0.3  $\mu$ M, 0.2  $\mu$ M and 0.1  $\mu$ M respectively.

### **ChIP-Seq**

BED files were downloaded from the GSE archive (accession GSE117164<sup>28</sup> for STAT3 ChIP-seq, GSE104261<sup>29</sup> and GSE29600<sup>30</sup> for NOTCH1 and NOTCH3 respectively). Files were sorted using BEDTools ("sort"), then converted into BEDGraph using BEDTools ('genomecov'), and then into BigWig track files using UCSC's "bedgraphToBigWig". The genome browser tracks were visualized in IGV v2.3.92.

### **Microarray data analysis**

Microarray files were collected from the GSE archive (accession GSE5827<sup>31</sup>, GSE104261<sup>29</sup> and GSE29600<sup>30</sup>) and analysed using NCBI's GEO2R online pipeline<sup>32</sup>, by creating a group for samples treated with the vehicle control, and another for samples treated with GSI. The top 250 hits (according to adjusted *p*-values) were then extracted from GEO2R; hits present in at least two of the three datasets were retained for display on a heatmap.



Normalized, absolute, microarray expression data of ALK+ ALCL (n=64), ALK- ALCL (n=30) and reactive lymph nodes (n=12) for NOTCH1, MYC and DTX1 was downloaded from the GSE archive (GSE6338<sup>33</sup>, GSE14879<sup>34</sup>, GSE19069<sup>5</sup>, GSE58445<sup>35</sup> and GSE78513<sup>36</sup>). Data were used to correlate mRNA expression of NOTCH1 with MYC, and NOTCH1 with DTX1, calculated by Pearson Correlation (using PRISM GraphPad 8).

### **Compounds, Cell Lines and Plasmids**

The following compounds were used: GSI-1 (Abcam, Cambridge, UK); PF-03084014 (Sigma-Aldrich, St-Louis, Missouri, US), Crizotinib (Sigma-Aldrich), all dissolved in DMSO, and Ionomycin (Sigma-Aldrich) dissolved in water. HEK293FT were cultured in DMEM/10% FBS/1% Pen-strep. Karpas-299, SU-DHL1, SUP-M2 and DEL cell lines were obtained from the DSMZ, Braunschweig, Germany; FEPD were provided by Annarosa Del Mistro, University of Padua, Italy; Mac2A from Olaf Merkel, Medical University Vienna, Austria. These cell lines were cultured in RPMI 1640/ 10% FBS/ 1% Pen-Strep. OP9-DL1 cells (provided by Alison Michie, Glasgow) were cultured in  $\alpha$ -MEM/20% FBS. All cell lines were incubated at 37 °C/5% CO<sub>2</sub>, were certified mycoplasma free on a quarterly basis and are detailed in Supplementary Table S11. Details of all plasmid vectors used in the study are provided in Supplementary Table S12.

### **Cellular Proliferation and Apoptosis**

Cell proliferation was measured by MTT (Sigma Aldrich) or RealTime-Glo (Promega, Madison, Wisconsin, US) assays according to the manufacturer's instructions. Using a SpectraMax i3 plate reader, absorbance at 570 nm for MTT assays and luminescence for RealTime-Glo were read. Apoptosis was assessed following incubation of 500,000 cells with 4  $\mu$ L of an APC-conjugated Annexin V antibody (Biolegend, San Diego, California, US) for 45 mins at room temperature and/or Propidium iodide (1  $\mu$ g/mL) (Sigma-Aldrich) followed by flow cytometry on a FACSCalibur (BD Bioscience). All flow cytometry data were analysed with FlowJo (FlowJo, LLC). To assess apoptosis, cells were gated to filter out cell debris (FSC/SSC) and to analyse only single cells (SSC-Height/SSC-Area).

**Site-Directed Mutagenesis**

Plasmids were amplified in a reaction mix consisting of 1X Pfu buffer, 100ng plasmid, 0.5  $\mu$ M of each primer (Supplementary Table S9), 500  $\mu$ M dNTPs and 5U Pfu Taq polymerase, supplemented with 2.5% DMSO at 92°C for 30 secs before 16 cycles of 92°C for 30 secs, 55°C for 1 min and 68°C for 25 mins. The parental plasmids were digested by incubation for one hour at 37°C with 10U DpnI. The product (2  $\mu$ L) was then transformed into XL-10 Gold competent bacteria (Agilent, Santa Clara, California, USA) before plasmid purification and Sanger sequencing to verify the presence of the desired variant.

**Lentiviral Production, Transductions and shRNA Silencing**

HEK293FT cells were seeded at 50% confluency 1 day before transfection in a T25 flask with 2.7  $\mu$ g of the plasmid of interest, 1.5  $\mu$ g pMD2.G (Addgene), 2.4  $\mu$ g psPAX2 (Addgene) and 19.2  $\mu$ L TransIT-293 (MirusBio, Madison, Wisconsin, USA) pre-mixed in Opti-MEM (Thermo Scientific, Waltham, Massachusetts, USA). Supernatant was collected 54 hrs later and overlaid onto the cells to be transduced, following which, after 24 hrs incubation, the appropriate antibiotic was added for 7 days (Supplementary Table S12). With respect to shRNA silencing, ALCL cell lines were transduced with shRNA constructs (Supplementary Table S12) and cells were then selected using the relevant antibiotic. Following 96 hrs of selection, RNA was extracted to verify gene silencing, further to which antibiotic selection was terminated and cells were cultured for downstream applications. The shRNA targeting STAT3 has been described and characterized previously<sup>28</sup>. A SU-DHL1 cell line and SUP-M2-derived cell line (also called 'TS') expressing a doxycycline-inducible NPM-ALK-targeting shRNA construct have been described and characterized previously<sup>37</sup>.

**Method References**

1. Shi J, Blundell TL, Mizuguchi K. FUGUE: sequence-structure homology recognition using environment-specific substitution tables and structure-dependent gap penalties. *J. Mol. Biol.* 2001;310(1):243–57.
2. Pandurangan AP, Ochoa-Montano B, Ascher DB, Blundell TL. SDM: a server for predicting effects of mutations on protein stability. *Nucleic Acids Res.* 2017;45(W1):229–235.
3. Rodrigues CH, Pires DE, Ascher DB. DynaMut: predicting the impact of mutations on protein conformation, flexibility and stability. *Nucleic Acids Res.* 2018;46(W1):350–355.
4. Pires DE V, Ascher DB, Blundell TL. mCSM: predicting the effects of mutations in proteins using graph-based signatures. *Bioinformatics.* 2014;30(3):335–42.
5. Crescenzo R, Abate F, Lasorsa E, et al. Convergent mutations and kinase fusions lead to oncogenic STAT3 activation in anaplastic large cell lymphoma. *Cancer Cell.* 2015;27(4):516–532.
6. Turinsky AL, Fanea E, Trinh Q, et al. CAVeMan: Standardized anatomical context for biomedical data mapping. *Anat. Sci. Educ.* 2008;1(1):10–18.
7. Ye K, Schulz MH, Long Q, Apweiler R, Ning Z. Pindel: a pattern growth approach to detect break points of large deletions and medium sized insertions from paired-end short reads. *Bioinformatics.* 2009;25(21):2865–2871.
8. Wang K, Li M, Hakonarson H. ANNOVAR: functional annotation of genetic variants from high-throughput sequencing data. *Nucleic Acids Res.* 2010;38(16):164.
9. Vaser R, Adusumalli S, Leng SN, Sikic M, Ng PC. SIFT missense predictions for genomes. *Nat. Protoc.* 2016;11(1):1–9.
10. Ramensky V, Bork P, Sunyaev S. Human non-synonymous SNPs: server and survey. *Nucleic Acids Res.* 2002;30(17):3894–900.
11. Chun S, Fay JC. Identification of deleterious mutations within three human genomes. *Genome Res.* 2009;19(9):1553–1561.
12. Stenson PD, Mort M, Ball E V, et al. The Human Gene Mutation Database: 2008 update. *Genome Med.* 2009;1(1):13.
13. Reva B, Antipin Y, Sander C. Predicting the functional impact of protein mutations: application to cancer genomics. *Nucleic Acids Res.* 2011;39(17):118.
14. Shihab HA, Gough J, Cooper DN, et al. Predicting the functional, molecular, and phenotypic consequences of amino acid substitutions using hidden Markov models. *Hum. Mutat.* 2013;34(1):57–65.
15. Choi Y, Sims GE, Murphy S, Miller JR, Chan AP. Predicting the Functional Effect of Amino Acid Substitutions and Indels. *PLoS One.* 2012;7(10):e46688.
16. Dong C, Wei P, Jian X, et al. Comparison and integration of deleteriousness prediction methods for nonsynonymous SNVs in whole exome sequencing studies. *Hum. Mol. Genet.* 2015;24(8):2125–37.
17. Kircher M, Witten DM, Jain P, et al. A general framework for estimating the relative pathogenicity of human genetic variants. *Nat. Genet.* 2014;46(3):310–5.

18. Shyr C, Tarailo-Graovac M, Gottlieb M, et al. FLAGS, frequently mutated genes in public exomes. *BMC Med. Genomics*. 2014;7(1):64.
19. Talevich E, Shain AH, Botton T, Bastian BC. CNVkit: Genome-Wide Copy Number Detection and Visualization from Targeted DNA Sequencing. *PLOS Comput. Biol.* 2016;12(4):e1004873.
20. Huang DW, Sherman BT, Lempicki RA. Systematic and integrative analysis of large gene lists using DAVID bioinformatics resources. *Nat. Protoc.* 2009;4(1):44–57.
21. Fabregat A, Jupe S, Matthews L, et al. The Reactome Pathway Knowledgebase. *Nucleic Acids Res.* 2018;46(D1):D649–D655.
22. Mi H, Huang X, Muruganujan A, et al. PANTHER version 11: Expanded annotation data from Gene Ontology and Reactome pathways, and data analysis tool enhancements. *Nucleic Acids Res.* 2017;45(D1):183–189.
23. Goto S, Bono H, Ogata H, et al. Organizing and computing metabolic pathway data in terms of binary relations. *Pacific Symp. Biocomput.* 1997;175–86.
24. The Gene Ontology Consortium. The Gene Ontology Resource: 20 years and still GOing strong. *Nucleic Acids Res.* 2019;47(D1):330–338.
25. Letunic I, Bork P. 20 years of the SMART protein domain annotation resource. *Nucleic Acids Res.* 2018;46(1):493–496.
26. Mitchell AL, Attwood TK, Babbitt PC, et al. InterPro in 2019: improving coverage, classification and access to protein sequence annotations. *Nucleic Acids Res.* 2019;47(D1):351–360.
27. Ceccon M, Mologni L, Bisson W, Scapozza L, Gambacorti-Passerini C. Crizotinib-Resistant NPM-ALK Mutants Confer Differential Sensitivity to Unrelated Alk Inhibitors. *Mol. Cancer Res.* 2013;11(2):122–132.
28. Menotti M, Ambrogio C, Cheong T-C, et al. Wiskott-Aldrich syndrome protein (WASP) is a tumor suppressor in T cell lymphoma. *Nat. Med.* 2019;25(1):130–140.
29. Choi SH, Severson E, Pear WS, et al. The common oncogenomic program of NOTCH1 and NOTCH3 signaling in T-cell acute lymphoblastic leukemia. *PLoS One.* 2017;12(10):e0185762.
30. Wang H, Zou J, Zhao B, et al. Genome-wide analysis reveals conserved and divergent features of Notch1/RBPJ binding in human and murine T-lymphoblastic leukemia cells. *Proc. Natl. Acad. Sci.* 2011;108(36):14908–13.
31. Sanchez-Martin M, Ambesi-Impiombato A, Qin Y, et al. Synergistic antileukemic therapies in NOTCH1-induced T-ALL. *Proc. Natl. Acad. Sci.* 2017;114(8):2006–2011.
32. Wilhite SE, Barrett T. Strategies to Explore Functional Genomics Data Sets in NCBI's GEO Database. *Methods Mol. Biol.* 2012;802:41–53.
33. Piccaluga PP, Agostinelli C, Califano A, et al. Gene expression analysis of peripheral T cell lymphoma, unspecified, reveals distinct profiles and new potential therapeutic targets. *J. Clin. Invest.* 2007;117(3):823–34.
34. Eckerle S, Brune V, Döring C, et al. Gene expression profiling of isolated tumour cells from anaplastic large cell lymphomas: insights into its cellular origin, pathogenesis and relation to Hodgkin lymphoma. *Leukaemia.* 2009;23(11):2129–38.
35. Iqbal J, Wright G, Wang C, et al. Gene expression signatures delineate biological and prognostic subgroups in peripheral T-cell lymphoma. *Blood.* 2014;123(19):2915–23.

36. Pomari E, Basso G, Bresolin S, et al. NPM-ALK expression levels identify two distinct subtypes of paediatric anaplastic large cell lymphoma. *Leukemia*. 2017;31(2):498–501.
37. Piva R, Chiarle R, Manazza AD, et al. Ablation of oncogenic ALK is a viable therapeutic approach for anaplastic large-cell lymphomas. *Blood*. 2006;107(2):689–97.
38. DuBridge RB, Tang P, Hsia HC, et al. Analysis of mutation in human cells by using an Epstein-Barr virus shuttle system. *Mol. Cell. Biol.* 1987;7(1):379–87.
39. Fischer P, Nacheva E, Mason DY, et al. A Ki-1 (CD30)-positive human cell line (Karpas 299) established from a high-grade non-Hodgkin's lymphoma, showing a 2;5 translocation and rearrangement of the T-cell receptor beta-chain gene. *Blood*. 1988;72(1):234–40.
40. Epstein AL, Levy R, Kim H, et al. Biology of the human malignant lymphomas. IV. Functional characterization of ten diffuse histiocytic lymphoma cell lines. *Cancer*. 1978;42(5):2379–91.
41. Dutil J, Chen Z, Monteiro AN, Teer JK, Eschrich SA. An Interactive Resource to Probe Genetic Diversity and Estimated Ancestry in Cancer Cell Lines. *Cancer Res*. 2019;79(7):1263–1273.
42. Barbey S, Gogusev J, Mouly H, et al. DEL cell line: a “malignant histiocytosis” CD30+t(5;6)(q35;p21) cell line. *Int. J. cancer*. 1990;45(3):546–53.
43. Davis TH, Morton CC, Miller-Cassman R, Balk SP, Kadin ME. Hodgkin's disease, lymphomatoid papulosis, and cutaneous T-cell lymphoma derived from a common T-cell clone. *N. Engl. J. Med.* 1992;326(17):1115–22.
44. del Mistro A, Leszl A, Bertorelle R, et al. A CD30-positive T cell line established from an aggressive anaplastic large cell lymphoma, originally diagnosed as Hodgkin's disease. *Leukemia*. 1994;8(7):1214–9.
45. Nakano T, Kodama H, Honjo T. Generation of lymphohematopoietic cells from embryonic stem cells in culture. *Science*. 1994;265(5175):1098–101.

Supplemental Figures

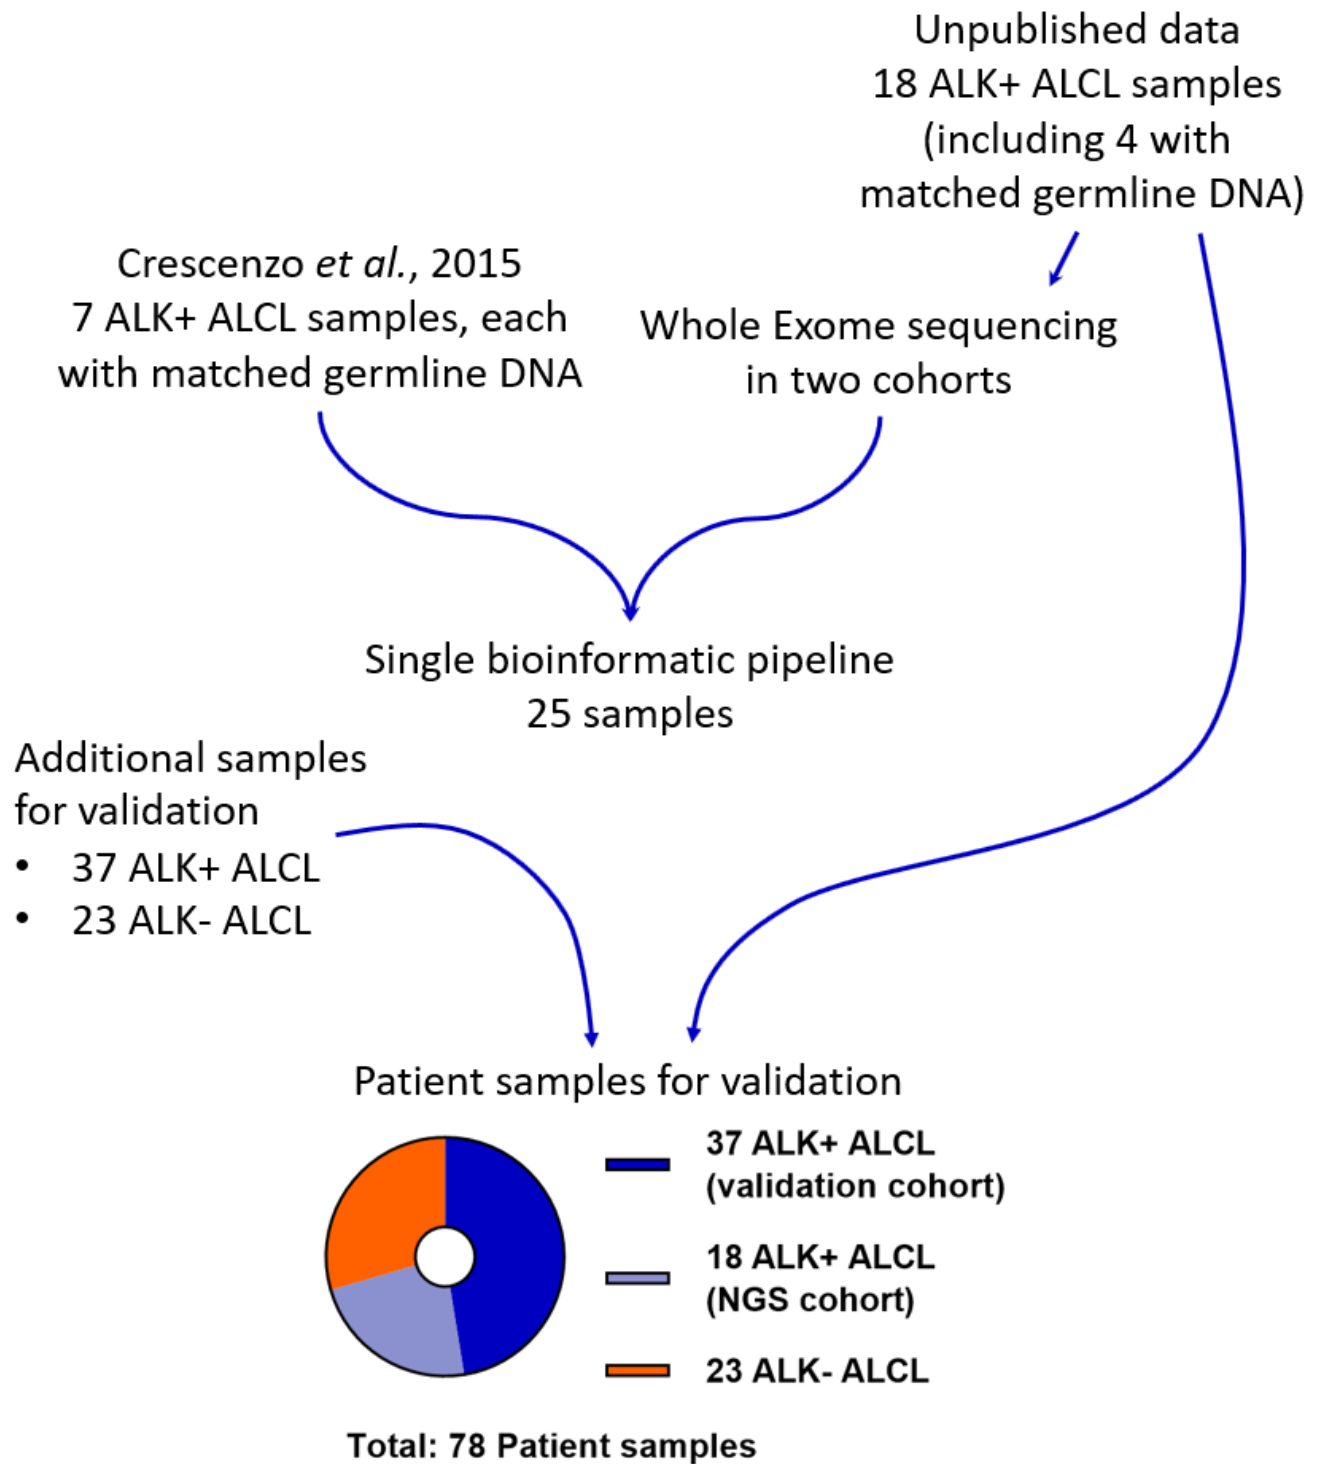

Supplementary Figure 1. Schematic representation of patient cohorts for which whole exome sequencing data were generated and analysed.

A

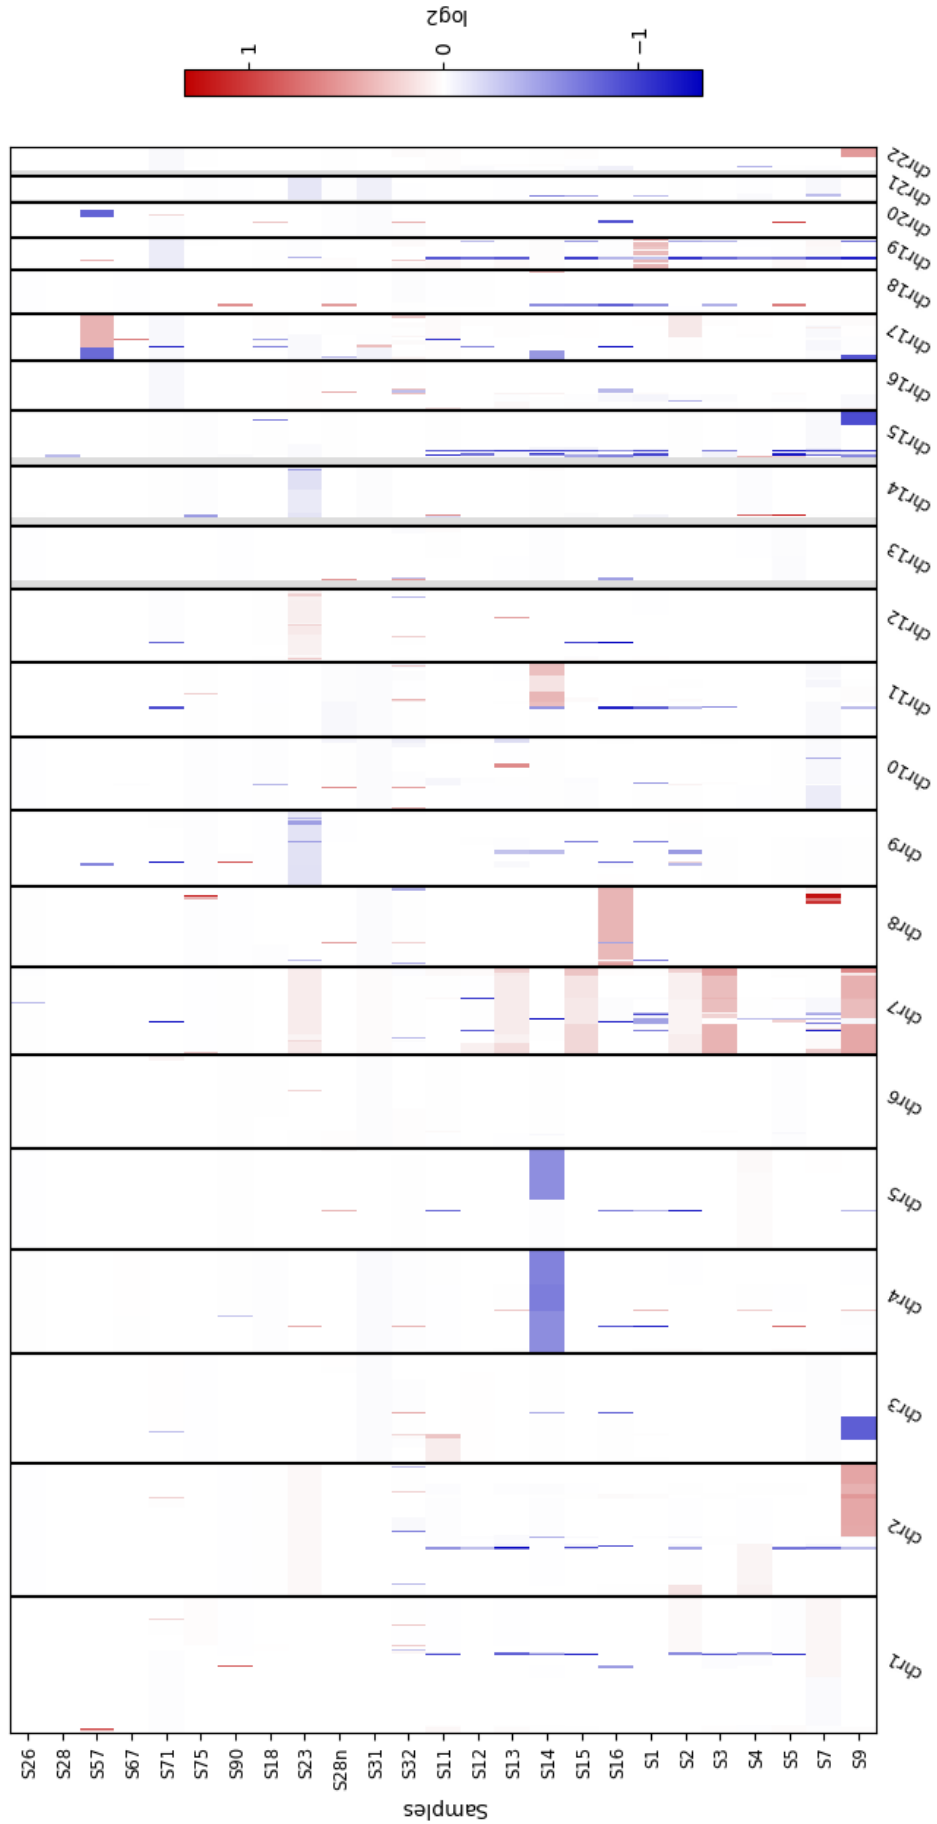

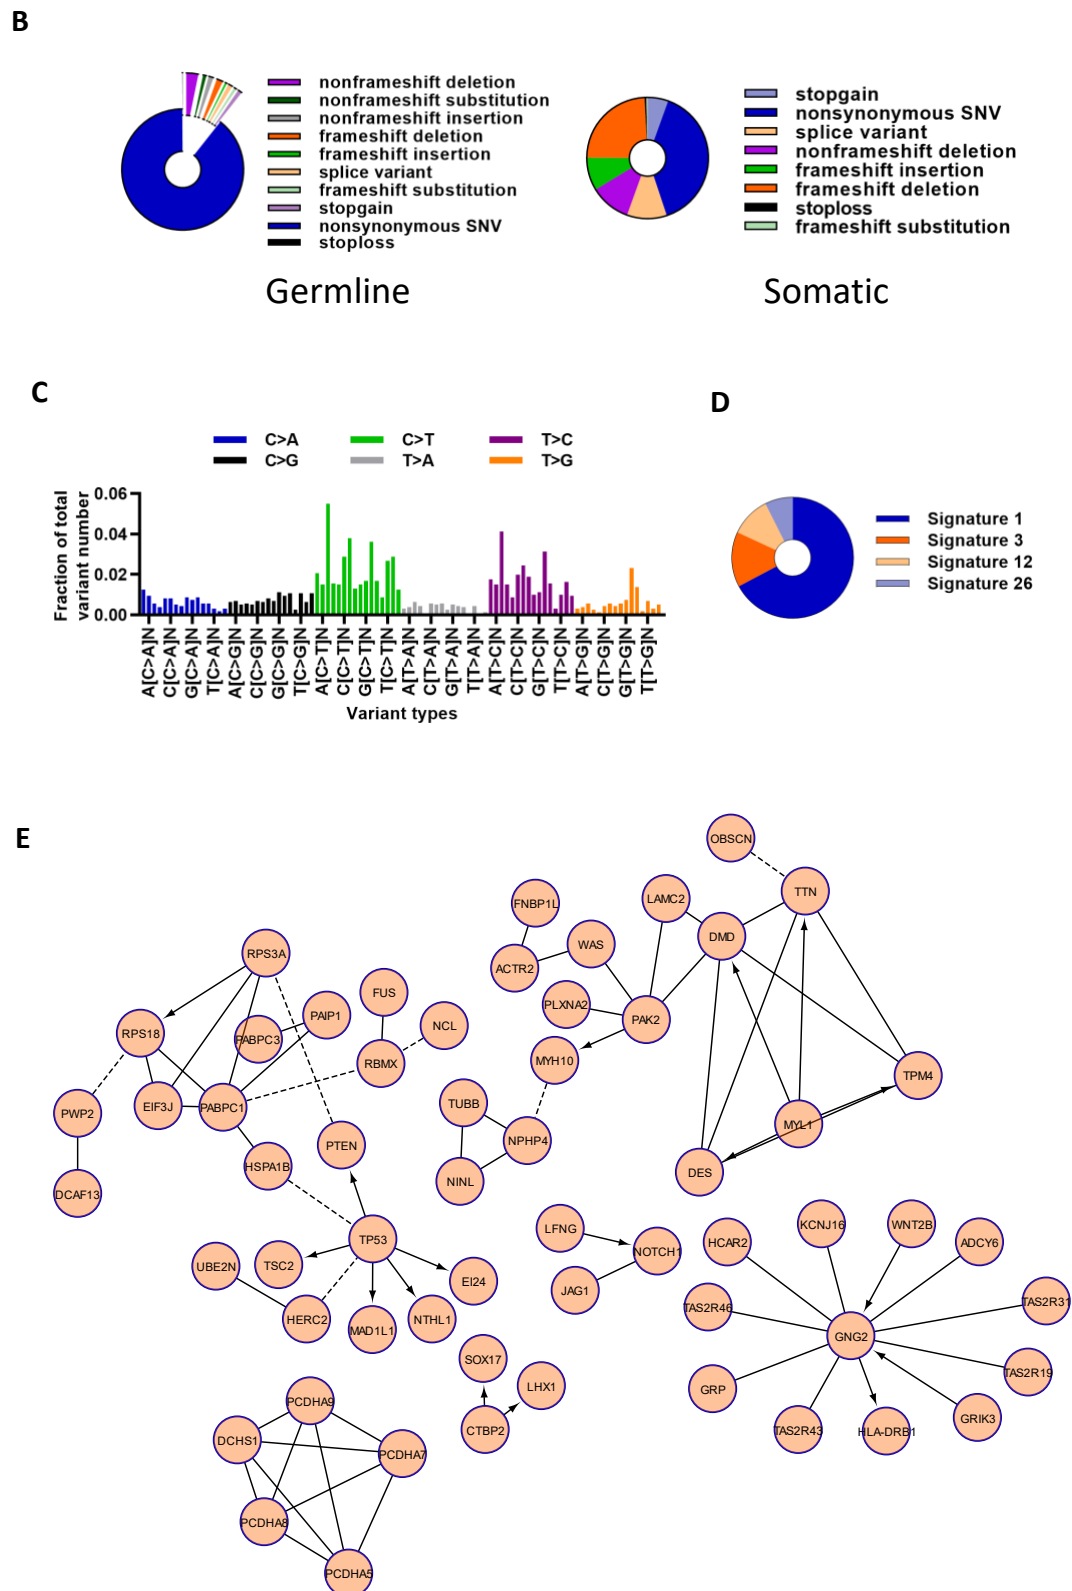

**Supplementary Figure 2. Further details regarding WES bioinformatic analysis. (A)** Autosome-wide heatmap of log<sub>2</sub> copy number segments in patient samples. **(B)** Distribution of variant type, averaged for germline samples (n=11) and somatic samples (n=25). **(C)** Prevalence of each of the 96 variant types for representative patient sample S57; these were then used to derive the mutational signature, as displayed for patient sample S57 **(D)**. **(E)** Nodular interaction plot showing connections between variants. The plot was designed using Reactome. Arrows indicate activating interactions, dotted lines indicate hypothesised interactions, lines ending with a perpendicular bar indicate inhibition.



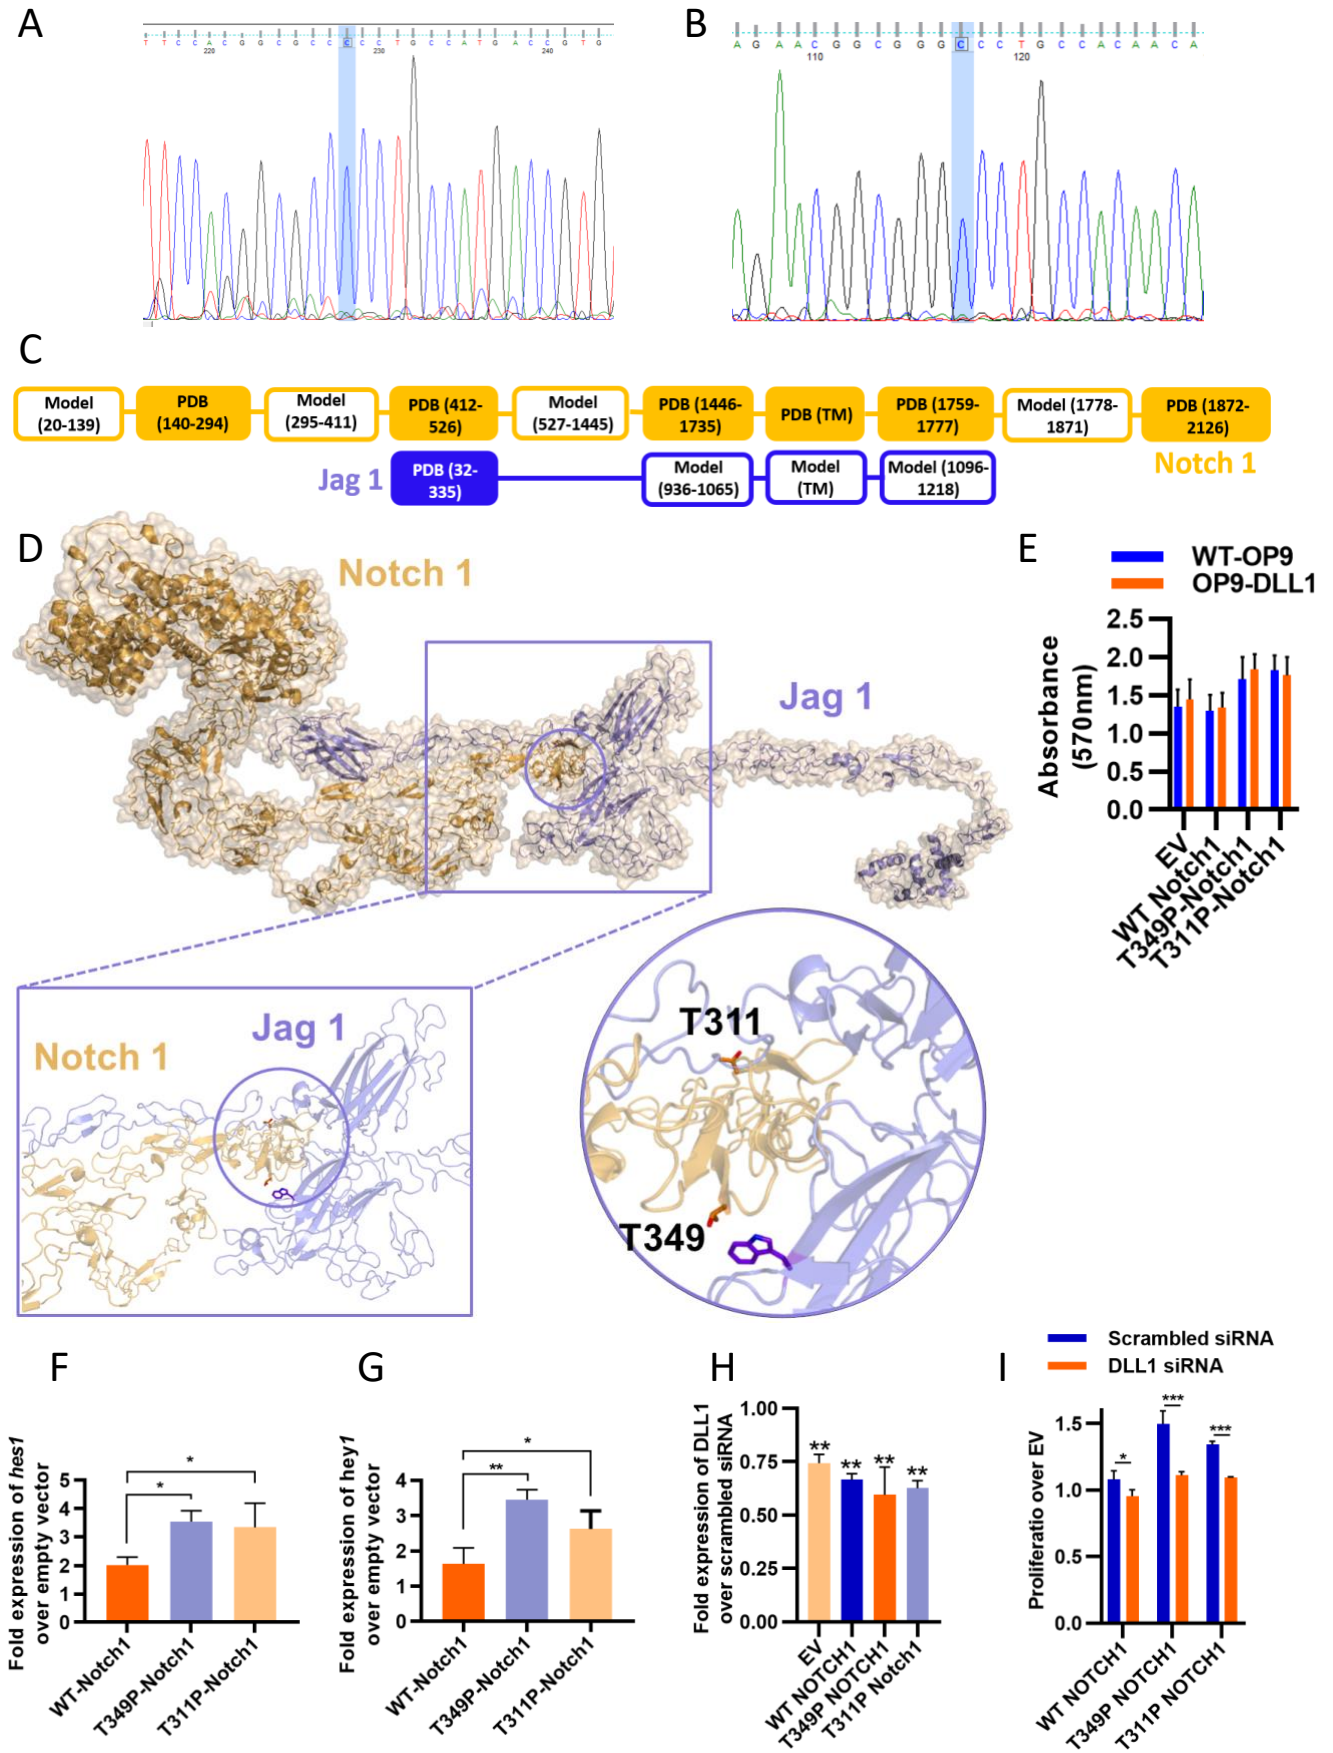

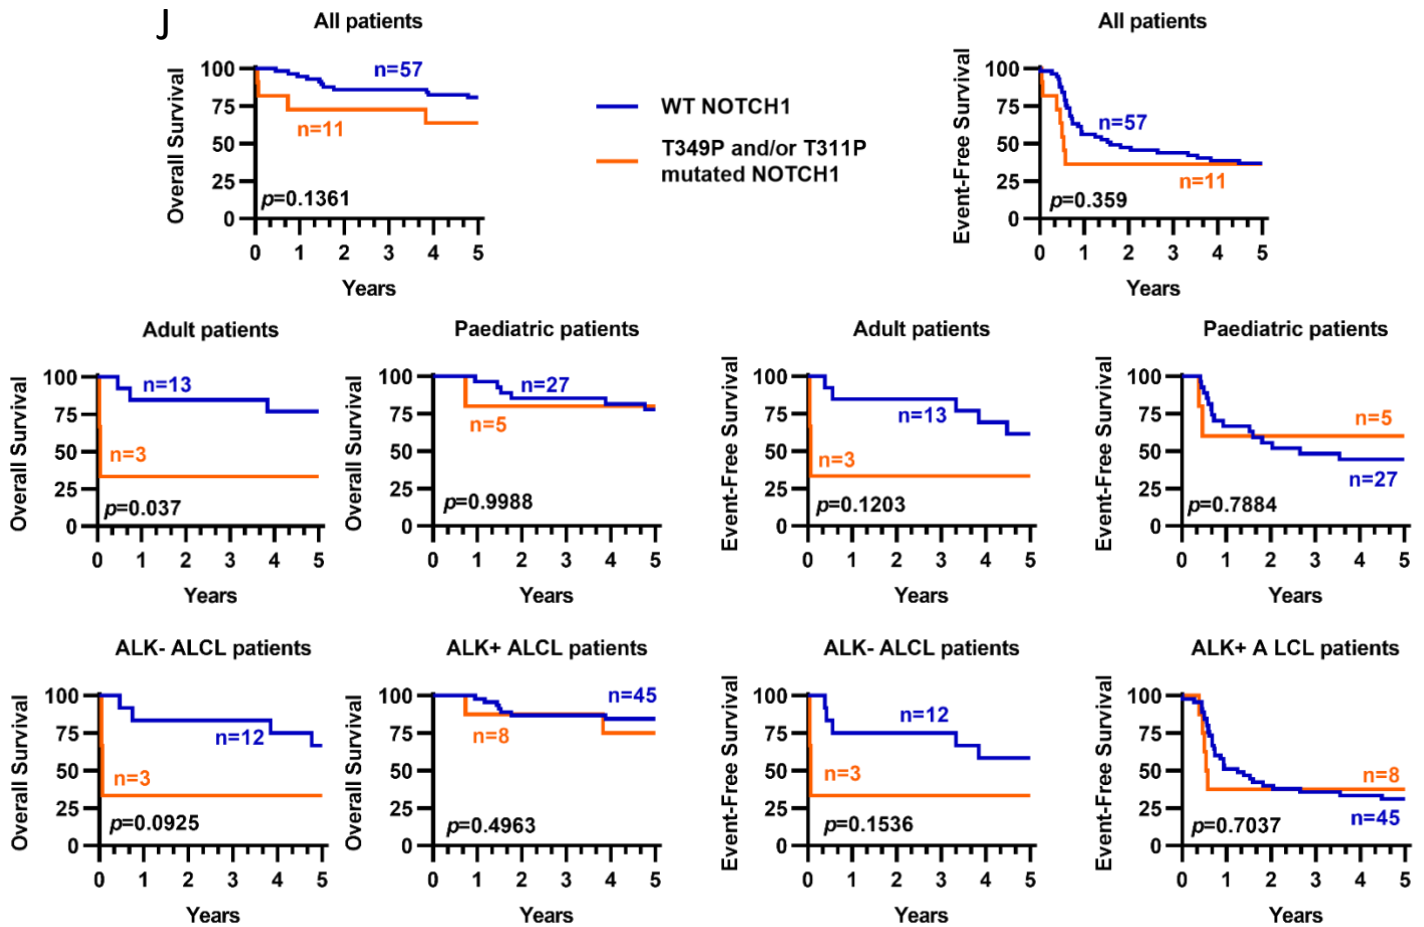

**Supplementary Figure 3. Modelling of the NOTCH1-JAG1 interaction.** Sanger chromatogram of a selected sequence of NOTCH1 showing mutations T311P (A) and T349P (B). (C) Schematic representation of the domains of NOTCH1 and JAG1, detailing which domains were modelled from scratch ('Model'), and which were solved structures available on the PDB ('PDB') (PDB IDs: 4XL1, 4XBM, 5MWB, 4D90, 1YMP, 1OT8). (D) Interaction of full-length NOTCH1 (orange) bound to its receptor Jag1 (purple), also modelled in full-length. The interaction between JAG1 and NOTCH1 is enlarged for easier visualisation, with an additional magnification to clearly show NOTCH1 amino acids T311 and T349. (E) MTT assay of HEK293 cells transfected with an Empty Vector (EV), or the Wild-type (WT), T349P or T311P Notch1 mutants, co-cultured with wild-type or DLL1-expressing OP9 cells. Fold-change expression of HES1 (F) or HEY1 (G) over empty-vector control as assessed by qPCR in HEK293FT cells expressing the wild-type or mutant NOTCH1 proteins (normalized to GAPDH and PPIA;  $*p<0.05$ ;  $**p<0.01$ ;  $n=3$ ). HEK293 cells expressing either an EV, WT or mutated NOTCH1 were transfected with siRNA to DLL1 or a control, scrambled siRNA (H) fold change expression of DLL1 over scrambled siRNA was assessed by qPCR (normalized to GAPDH and PPIA ( $**p<0.01$ ;  $n=3$ ); and (I) fold change proliferation over EV was assessed by MTT assay ( $*p<0.05$ ;  $**p<0.01$ ;  $***p<0.001$ ;  $n=3$ ). (J) Kaplan-Meier Overall and Event-Free Survival plots of patients in our validation cohort for whom we hold at least 5-years of follow-up clinical data, comparing patients that are wild-type (WT), T349P and/or T311P-mutated for NOTCH1, comparing all patients; paediatric patients (18 years and under), adult patients (19 years and above), ALK+ ALCL and ALK- ALCL patients.  $p$ -value determined using the log-rank test.

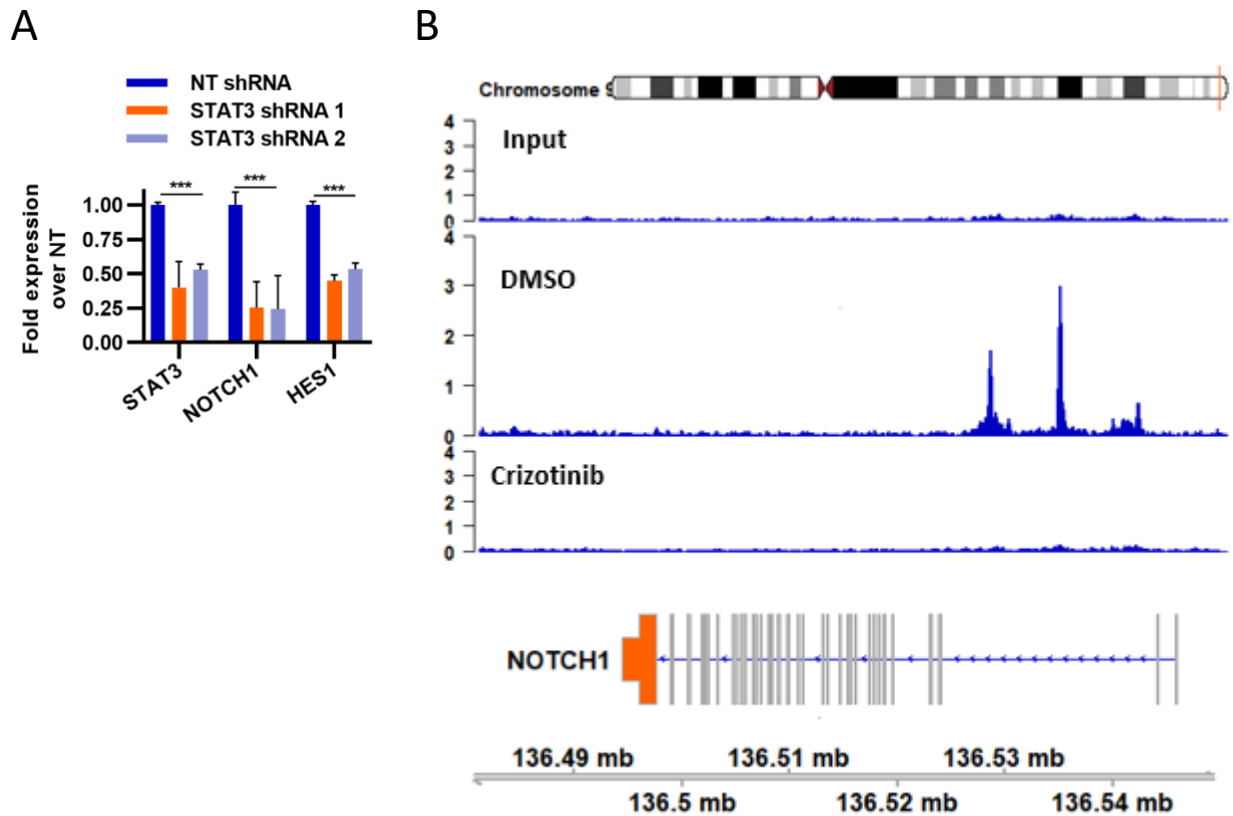

**Supplementary Figure 4. ChIP-seq showing binding of STAT3 to the NOTCH1 promoter region. (A)** Fold-change expression of the indicated genes over non-targeting control shRNA transduced cells (normalized to GAPDH) in the FEPD cell line 48 hours after transduction with control non-targeting (NT) shRNA, or one of two shRNAs targeting STAT3 as determined by qPCR ( $***p < 0.001$ ;  $n=3$ ). All bar plots display the mean of biological replicates and error bars represent standard deviations; the bar plots are colour-coded as indicated in the Figure. **(B)** Binding of STAT3 to promoter regions of NOTCH1 in JB6 cells treated with a vehicle control (middle track) or Crizotinib (lower track); the upper track shows the input, data obtained by analysing previously published data<sup>28</sup>.

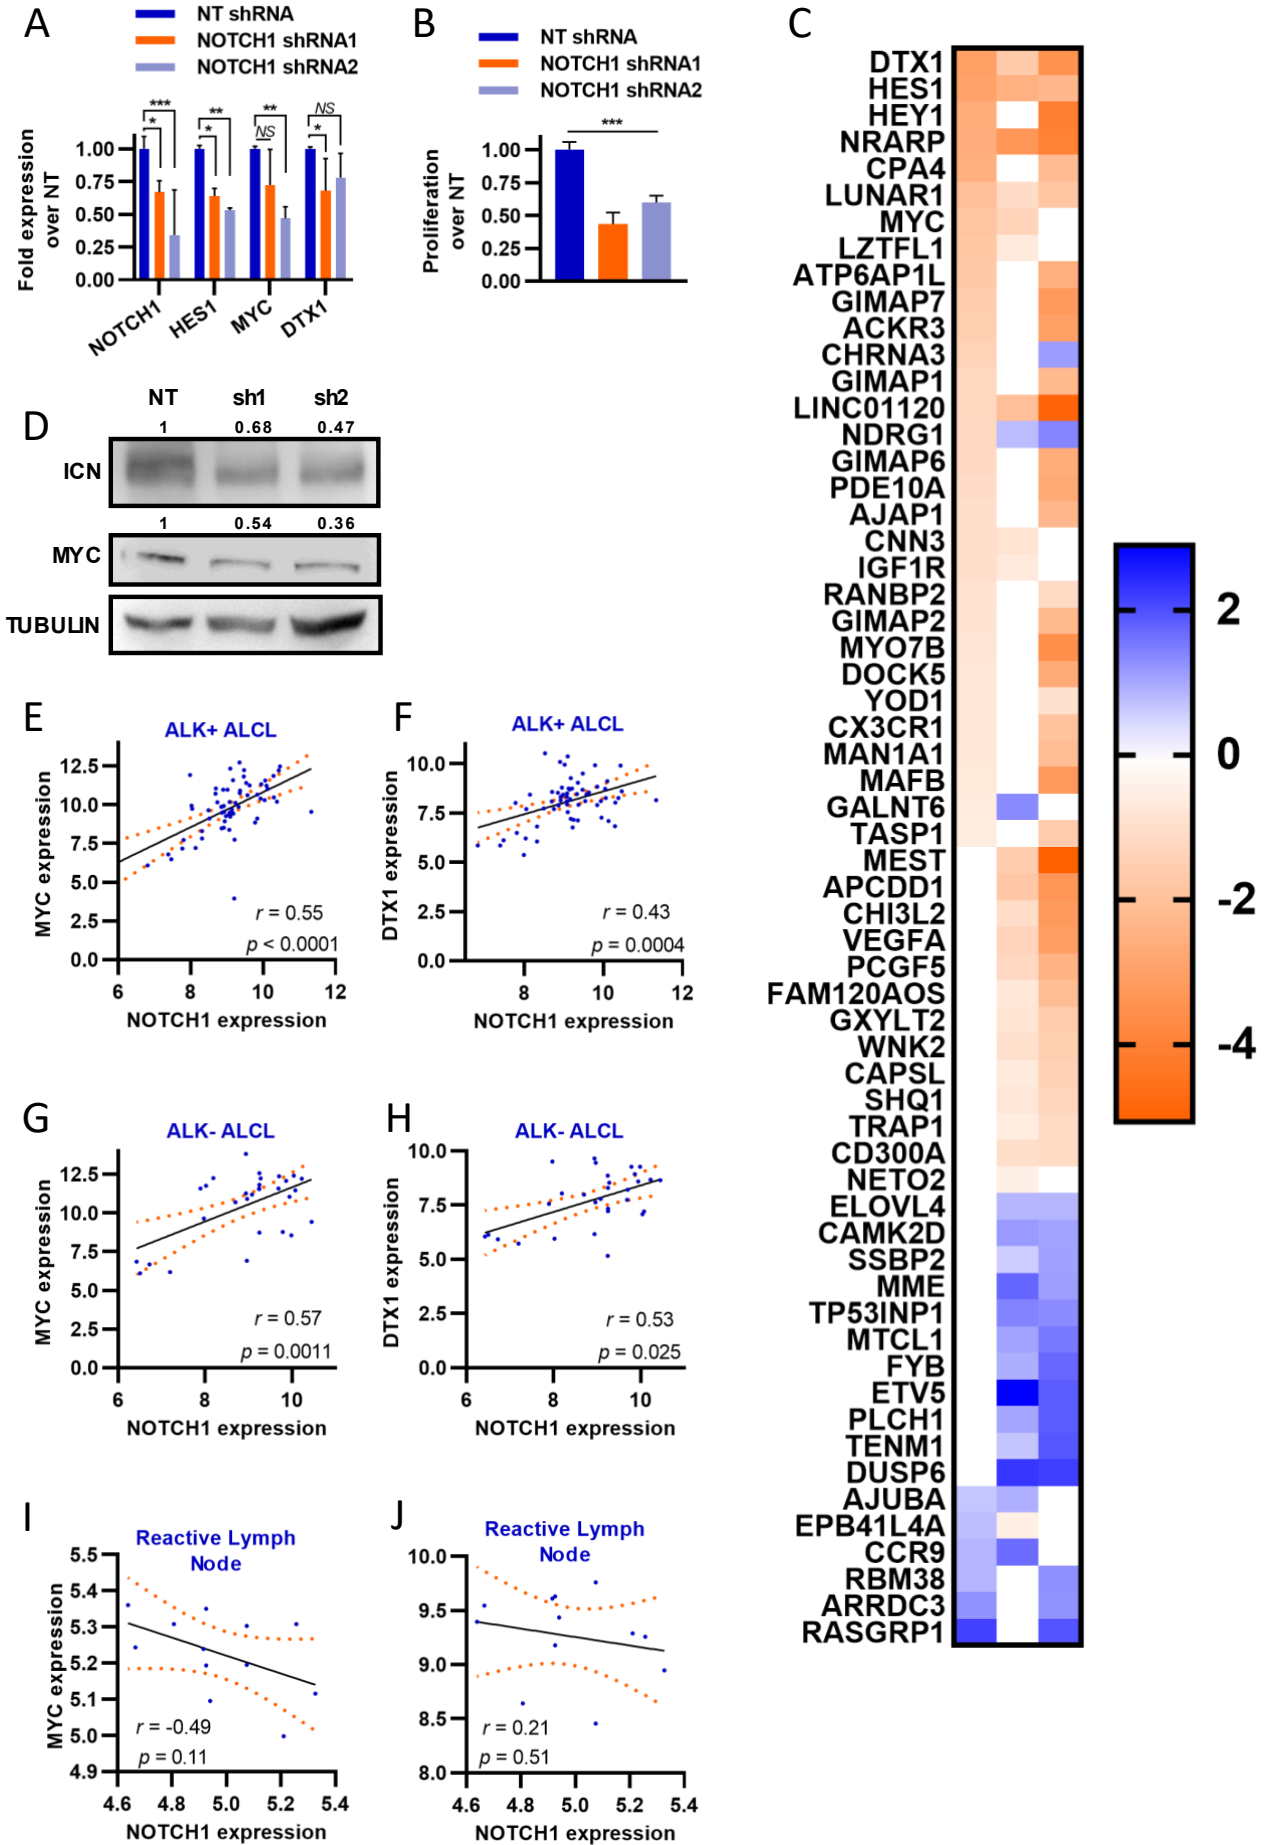

**Supplementary Figure 5. Changes in gene expression upon GSI treatment in T-ALL. (A)** Fold-change expression of the indicated genes over non-targeting control shRNA transduced cells (normalized to GAPDH) in the ALK- ALCL cell line FEPD, 48 hours after transduction with control non-targeting (NT) shRNA, or one of two shRNA targeting NOTCH1 as determined by qPCR (NS: Not Significant; \* $p < 0.05$ ; \*\* $p < 0.01$ ; \*\*\* $p < 0.001$ ;  $n = 3$ ). All bar plots display the mean of biological replicates and error bars represent standard deviations; the bar plots are colour-coded as indicated in the Figure. **(B)** Proliferation of the ALK- ALCL cell line FEPD over the non-targeting shRNA control, determined using an MTT assay, 48 hours after transduction with control non-targeting (NT) shRNA, or one of two shRNAs targeting NOTCH1 (\*\*\* $p < 0.001$ ;  $n = 3$ ). **(C)** Analysis of microarray data from three separate publications of the T-ALL cell line CUTLL-1, representing the fold-change in expression of the top 250 target genes (assessed by adjusted  $p$ -values) in the presence of GSI (over a vehicle control); analysing previously published data<sup>29–31</sup>. **(D)** Western Blot for MYC, intracellular NOTCH1 (ICN) and a loading control (TUBULIN), in DEL cell lines transfected either with non-Targeting (NT) or NOTCH1-targeting (sh1, sh2) shRNA-expression constructs. Only the relevant sections of the whole blot are displayed, the contrast was modified on the whole image to improve legibility. Pearson correlation of MYC or DTX1 and NOTCH1 mRNA expression in ALK+ ALCL (**E, F**;  $n = 64$ ), ALK- ALCL (**G, H**;  $n = 30$ ) and Reactive Lymph Nodes (**I, J**;  $n = 12$ ), including the  $r$ -score,  $p$ -value, linear regression line (in black) and 95% confidence interval (in orange), using published microarray data.



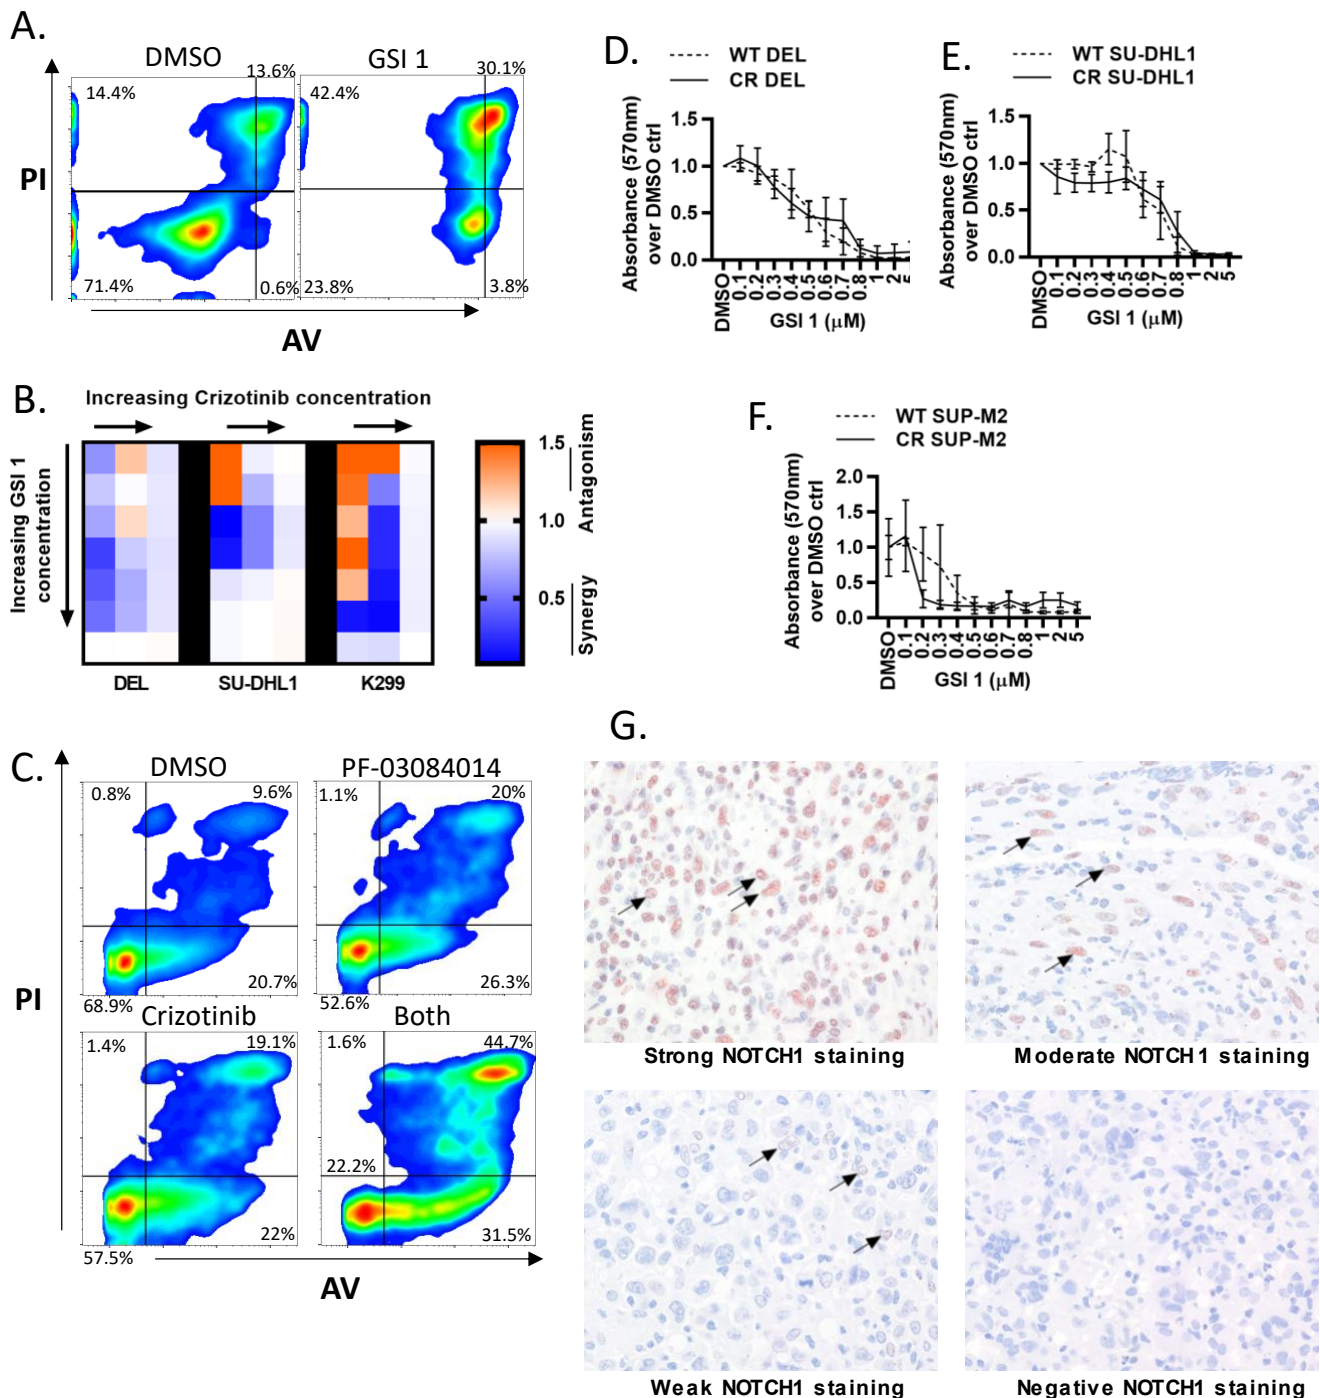

**Supplementary Figure 6. Proliferation of cell lines when treating with GSI 1.** (A) Representative FACS plots for cells stained for Annexin V and PI when treated either with vehicle control or 1  $\mu$ M GSI-I for 48 hrs. (B) BLISS matrix showing the combination index on treating the indicated ALK+ ALCL cell lines with Crizotinib and GSI-1 for 72 hrs (using a range of concentrations of 25-100 nM for Crizotinib, and 100 nM-1  $\mu$ M GSI-1). A combination index of <1 indicates synergy between drugs, 1 indicates additive effects, >1 indicates antagonistic effects ( $n=3$ ). (C) Representative FACS plots of cells stained for Annexin V and PI when treated either with vehicle control, 40 nM Crizotinib, 2  $\mu$ M PF-03084014 or a combination of PF-03084014 and Crizotinib for 48 hours. Proliferation over vehicle control of wild-type and Crizotinib-resistant DEL (D), SU-DHL1 (E) and SUP-M2 (F) cells when treated with increasing concentrations of GSI 1, as measured by MTT assay ( $n=3$ ; CR= Crizotinib Resistant, WT=Wild-type). (G) ALCL patient tissue, taken at presentation, were stained for cleaved NOTCH1 and classified according to expression levels: strong, moderate, weak or negative cleaved NOTCH1 staining for which representative examples are shown.

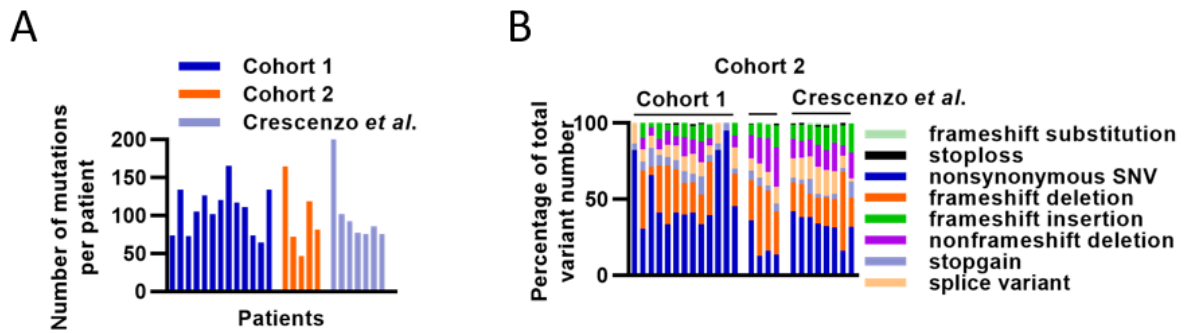

**Supplemental Figure 7. Quality Controls for bioinformatic processing. (A)** Number of mutations per patient, colour-coded to reflect the three sequencing cohorts. **(B)** Distribution of variant types for each patient, separating out the three sequencing cohorts: the samples obtained from an online repository ('Crescenzo et al.'), and the two cohorts of patient samples sequenced for this publication (see Figure S1).

| Characteristic   | Subgroup                   | Number | Fraction of total |
|------------------|----------------------------|--------|-------------------|
| Gender           | Male                       | 8      | 32%               |
|                  | Female                     | 10     | 40%               |
|                  | Unknown                    | 7      | 28%               |
| Age at diagnosis | 0-15                       | 16     | 64%               |
|                  | 16-25                      | 3      | 12%               |
|                  | 26-40                      | 1      | 4%                |
|                  | >40                        | 5      | 20%               |
| ALK Status       | +                          | 25     | 100%              |
|                  | -                          | 0      | 0%                |
| Matched blood    | Yes                        | 11     | 44%               |
|                  | No                         | 14     | 56%               |
| Follow-up known? | 5-year EFS known           | 18     | 72%               |
|                  | 5-year OS known            | 17     | 68%               |
|                  | No                         | 7      | 28%               |
| Source           | CCLG                       | 18     | 72%               |
|                  | Crescenzo et al; SRP044708 | 7      | 28%               |

**Supplementary Table 1:** Characteristics of the patient tumour samples obtained from the Children's Cancer and Leukaemia Group (CCLG) tissue bank for which WES was conducted or whose WES data was downloaded from the Sequence Read Archive (SRP044708).

| Characteristic   | Subgroup         | Number | Fraction of total |
|------------------|------------------|--------|-------------------|
| Gender           | Male             | 12     | 15.4%             |
|                  | Female           | 15     | 19.2%             |
|                  | Unknown          | 51     | 65.4%             |
| Age at diagnosis | 0-15             | 26     | 33.3%             |
|                  | 16-25            | 8      | 10.3%             |
|                  | 26-40            | 3      | 3.8%              |
|                  | >40              | 24     | 30.8%             |
|                  | Unknown          | 17     | 21.8%             |
| ALK status       | +                | 55     | 70.5%             |
|                  | -                | 23     | 29.5%             |
| Matched blood    | Yes              | 12     | 15.4%             |
|                  | No               | 66     | 84.6%             |
| Follow-up known? | 5-year EFS known | 61     | 78.2%             |
|                  | 5-year OS known  | 46     | 59.0%             |
|                  | No               | 17     | 21.8%             |
| Source           | UK               | 30     | 38.5%             |
|                  | France           | 19     | 24.4%             |
|                  | Czech Republic   | 10     | 12.8%             |
|                  | Giessen          | 6      | 7.7%              |
|                  | Ukraine          | 8      | 10.3%             |
|                  | Graz             | 5      | 6.4%              |

**Supplementary Table S2:** Characteristics of the 78 patient samples that were employed to validate the presence of NOTCH1 variants in a larger patient population.



| Characteristic                     | Subgroup                                         | Number | Fraction of total |
|------------------------------------|--------------------------------------------------|--------|-------------------|
| Gender                             | Male                                             | 65     | 73.0%             |
|                                    | Female                                           | 24     | 27.0%             |
| Age at diagnosis                   | <10                                              | 33     | 37.1%             |
|                                    | 11+                                              | 56     | 62.9%             |
| ALK Status                         | +                                                | 89     | 100.0%            |
| Central nervous system involvement | Yes                                              | 1      | 1.1%              |
|                                    | No                                               | 84     | 94.4%             |
|                                    | Unknown                                          | 4      | 4.5%              |
| Bone marrow involvement            | Yes                                              | 6      | 6.7%              |
|                                    | No                                               | 83     | 93.3%             |
| Clinical Study                     | NHL-BFM 90                                       | 25     | 28.1%             |
|                                    | NHL-BFM 95                                       | 23     | 25.8%             |
|                                    | ALCL99                                           | 41     | 46.1%             |
| Staging at diagnosis               | Stage I                                          | 9      | 10.1%             |
|                                    | Stage II                                         | 17     | 19.1%             |
|                                    | Stage III                                        | 58     | 65.2%             |
|                                    | Stage IV                                         | 5      | 5.6%              |
| Events                             | Relapse/Progress                                 | 29     | 32.6%             |
|                                    | Toxic Death                                      | 3      | 3.4%              |
|                                    | Complete Cytogenic Response                      | 19     | 21.3%             |
|                                    | Lost to Follow-up in Complete Cytogenic Response | 38     | 42.7%             |

**Supplementary Table S3:** Characteristics of the 89 patient tissues that were stained for NOTCH1 expression on the tissue microarray, from which clinical data allowed computation of the 10-year EFS.

| Source                                                              | Library Prep Kit              | Sequencing machine  | Matched blood available | Sample ID | Coverage (x read depth) |
|---------------------------------------------------------------------|-------------------------------|---------------------|-------------------------|-----------|-------------------------|
| <b>SRP044708</b>                                                    | SureSelect 50 Mb All Exon kit | Illumina HiSeq 2000 | Yes                     | S26       | 187.02                  |
|                                                                     |                               |                     |                         | S28       | 156.00                  |
|                                                                     |                               |                     |                         | S57       | 228.53                  |
|                                                                     |                               |                     |                         | S67       | 223.40                  |
|                                                                     |                               |                     |                         | S71       | 241.77                  |
|                                                                     |                               |                     |                         | S75       | 210.48                  |
|                                                                     |                               |                     |                         | S90       | 92.04                   |
| <b>CCLG tissue bank cohort 1</b>                                    | Nextera Rapid Capture Exome   | Illumina HiSeq 2500 | No                      | S18       | 284.79                  |
|                                                                     |                               |                     | Yes                     | S23       | 163.38                  |
|                                                                     |                               |                     | Yes                     | S28n      | 252.91                  |
|                                                                     |                               |                     | Yes                     | S31       | 172.06                  |
|                                                                     |                               |                     | Yes                     | S32       | 187.01                  |
| <b>CCLG – tissue bank cohort 2 (all from ALCL99 clinical trial)</b> | Nextera Rapid Capture Exome   | Illumina MiSeq      | No                      | S1        | 176.72                  |
|                                                                     |                               |                     |                         | S2        | 57.18                   |
|                                                                     |                               |                     |                         | S3        | 156.00                  |
|                                                                     |                               |                     |                         | S4        | 59.72                   |
|                                                                     |                               |                     |                         | S5        | 149.94                  |
|                                                                     |                               |                     |                         | S7        | 152.39                  |
|                                                                     |                               |                     |                         | S9        | 73.57                   |
|                                                                     |                               |                     |                         | S11       | 87.26                   |
|                                                                     |                               |                     |                         | S12       | 195.30                  |
|                                                                     |                               |                     |                         | S13       | 82.51                   |
|                                                                     |                               |                     |                         | S14       | 176.72                  |
|                                                                     |                               |                     |                         | S15       | 44.26                   |
|                                                                     |                               |                     |                         | S16       | 176.72                  |

**Supplementary Table S4:** WES details for the three different patient sample cohorts (all fresh frozen tissues and all ALK+ ALCL), including sample names and coverage detail. CCLG = Childrens' Cancer and Leukaemia Group.

| Name                           | Source                                   | Application  | Quantity used |
|--------------------------------|------------------------------------------|--------------|---------------|
| PE-conjugated DLL-1            | ThermoFisher Scientific, Cat# 12-5767-80 | FACS         | 0.2 µg        |
| (Mouse) NOTCH1 (intracellular) | ThermoFisher Scientific, Cat# 14-5785-81 | Western blot | 1:500         |
| (Mouse) NOTCH1 (whole-length)  | Sigma-Aldrich, Cat# N6786                | Western blot | 1:500         |
| (Mouse) α-tubulin              | Sigma-Aldrich, Cat# T9062                | Western blot | 1:2000        |
| HRP anti-rabbit IgG            | CiteAb, Cat# P0161                       | Western blot | 1:10000       |
| HRP anti-mouse IgG             | CiteAb, Cat# P0448                       | Western blot | 1:10000       |
| (Rabbit) phospho-ALK (Tyr1278) | Cell Signaling Technology, Cat# 6941S    | Western blot | 1:1000        |
| (Rabbit) ALK                   | Cell Signaling Technology, Cat# 3633S    | Western blot | 1:1000        |
| (Rabbit) STAT3                 | Cell Signaling Technology, Cat# 4904SS   | Western blot | 1:1000        |
| STAT3                          | Cell Signaling Technology, Cat# 9139     | ChIP         | 3 µg          |
| GFP                            | Abcam, Cat# ab290                        | ChIP         | 3 µg          |
| Human NOTCH1 (intracellular)   | ThermoFisher Scientific, Cat# 14-5785-81 | IF           | 1:80          |

**Supplementary Table S5:** Detailed list of antibodies used in this study.

| Gene     | # Patients | Position       | Exon       | Ntde change   | AA change   | Type of mutation       | COSMIC ID   | dbSNP ID    | Transcript ID |
|----------|------------|----------------|------------|---------------|-------------|------------------------|-------------|-------------|---------------|
| TYW1B    | 23         | chr7:72728896  | exon 9     | G1118A        | W373X       | stopgain               |             | rs3015858   | NM_01145440   |
| DEFB132  | 20         | chr20:257795   | exon 1     | 17-22 del     | 6-8 del     | nonframeshift deletion | COSM1163662 | rs371825938 | NM_207469     |
| KCNJ18   | 20         | chr17:21703303 | exon 3     | G517A         | D173N       | nonsynonymous SNV      |             |             | NM_01194958   |
| MIR1-1HG | 18         | chr20:62565060 | exon 3     | T80C          | V27A        | nonsynonymous SNV      | COSM3758712 | rs6062251   | NM_178463     |
| ZNF283   | 17         | chr19:43847015 | whole gene | del GGAGAT    |             | frameshift deletion    | COSM1394324 | rs71907168  | NM_01297752   |
| NRDC     | 17         | chr1:51840392  | exon 2     | 462-464 del   | 154-155 del | nonframeshift deletion | COSM1237693 | rs35723519  | NM_01101662   |
| ZNF720   | 16         | chr16:31759375 | exon 5     | 381 ins A     |             | frameshift insertion   |             | rs34487972  | NM_01130913   |
| PYGL     | 16         | chr14:50911873 |            | del T         |             | splicing variant       |             | rs11356035  |               |
| MS4A14   | 15         | chr11:60397880 | exon 2     | 167-168 del   |             | frameshift deletion    | COSM1684267 | rs3217518   | NM_01079692   |
| CLECL1   | 15         | chr12:9733111  | exon 1     | 153 ins ACTTA |             | frameshift insertion   |             | rs113222621 | NM_01253750   |
| MYO15B   | 14         | chr17:75601463 | exon 14    | A3437G        | K1146R      | nonsynonymous SNV      | COSM4130628 | rs11871553  | NM_01309242   |
| RIC8A    | 13         | chr11:209895   | exon 3     | 621-623 del   | 207-208 del | nonframeshift deletion | COSM1317342 | rs3832797   | NM_01286134   |
| STK31    | 13         | chr7:23717543  | exon 4     | G144C         | Q48H        | nonsynonymous SNV      | COSM3762594 | rs6945306   | NM_01260504   |
| TAAR9    | 13         | chr6:132538470 | exon 1     | A181T         | K61X        | stopgain               |             | rs2842899   | NM_175057     |
| CCDC129  | 12         | chr7:31658299  | exon 15    | 3097 ins T    |             | frameshift insertion   |             | rs35589779  | NM_01257968   |
| IRF5     | 12         | chr7:128947298 | exon 6     | 502-531 del   | 168-177 del | nonframeshift deletion | COSM5002496 | rs199508964 | NM_01098627   |
| CYP3A5   | 12         | chr7:99672916  |            | T>C           |             | splicing variant       |             | rs776746    |               |

|          |    |                |         |               |            |                        |             |             |              |
|----------|----|----------------|---------|---------------|------------|------------------------|-------------|-------------|--------------|
| ZNF3     | 11 | chr7:100064889 | exon 6  | 292-295 del   |            | frameshift deletion    | COSM5001700 | rs56833874  | NM_017715    |
| ZNF219   | 11 | chr14:21092594 | exon 3  | 698-703 del   | 233-235del | nonframeshift deletion | COSM248523  | rs11278664  | NM_001101672 |
| PSPH     | 11 | chr7:56019672  | exon 5  | T203C         | L68P       | nonsynonymous SNV      |             | rs78067484  | NM_004577    |
| PSPH     | 11 | chr7:56019681  | exon 5  | G194A         | R65H       | nonsynonymous SNV      |             | rs200442078 | NM_004577    |
| TYRO3    | 11 | chr15:41570603 |         | G>T           |            | splicing variant       | COSM1478102 | rs200684350 |              |
| SCRN3    | 10 | chr2:174427853 | exon 8  | 1212-1224 del |            | frameshift deletion    | COSM253915  | rs145699077 | NM_001193528 |
| CDCP2    | 10 | chr1:54139645  | exon 4  | 1224 ins C    |            | frameshift insertion   |             | rs36013100  | NM_201546    |
| SYT15    | 10 | chr10:46584599 | exon 6  | G927C         | E309D      | nonsynonymous SNV      | COSM4144699 | rs3127785   | NM_031912    |
| GXYLT1   | 10 | chr12:42087868 | exon 7  | G1148A        | C383Y      | nonsynonymous SNV      |             | rs200973030 | NM_001099650 |
| MROH5    | 10 | chr8:141494938 |         | C>T           |            | splicing variant       |             | rs6578193   |              |
| PTCHD3   | 9  | chr10:27413327 | exon 1  | 923 ins G     |            | frameshift insertion   |             | rs112067123 | NM_001034842 |
| HOM EZ   | 9  | chr14:23275618 | exon 2  | 1608-1610 del | 536_537del | nonframeshift deletion | COSM954652  | rs35076736  | NM_020834    |
| POTE E   | 9  | chr2:131264056 | exon 15 | G2601T        | E867D      | nonsynonymous SNV      | COSM4303570 | rs7424029   | NM_001083538 |
| PSPH     | 9  | chr7:56019607  | exon 5  | G268A         | G90S       | nonsynonymous SNV      |             | rs75395437  | NM_004577    |
| PDE4 DIP | 9  | chr1:149005097 | exon 27 | A4075G        | K1359E     | nonsynonymous SNV      | COSM4590058 | rs1747958   | NM_001198834 |
| TRPT1    | 9  | chr11:64226062 |         | G>C           |            | splicing variant       |             | rs2429457   |              |
| TYRO3    | 8  | chr15:41570156 | exon 10 | 1382 del      |            | frameshift deletion    |             |             | NM_006293    |
| RNPC3    | 8  | chr1:103533845 | exon 3  | 347 del       |            | frameshift deletion    |             | rs772963253 | NM_017619    |
| CELA1    | 8  | chr12:51329814 | exon 7  | 628 ins C     |            | frameshift insertion   |             | rs17860363  | NM_001971    |
| UBE2N    | 8  | chr12:93411143 | exon 2  | C187G         | P63A       | nonsynonymous SNV      |             |             | NM_003348    |

|         |   |                |         |              |             |                        |             |             |              |
|---------|---|----------------|---------|--------------|-------------|------------------------|-------------|-------------|--------------|
| VWF     | 8 | chr12:6018901  | exon 28 | C4517T       | S1506L      | nonsynonymous SNV      | COSM5313831 | rs61750100  | NM_000552    |
| ACTR2   | 8 | chr2:65261302  | exon 7  | C791T        | A264V       | nonsynonymous SNV      |             |             | NM_005722    |
| DNAJC28 | 7 | chr21:33488443 | exon 2  | 947-951 del  |             | frameshift deletion    |             | rs139852262 | NM_001040192 |
| SSPO    | 7 | chr7:149806829 | exon 58 | 8748 del     |             | frameshift deletion    |             | rs66470151  | NM_198455    |
| CYP4B1  | 7 | chr1:46815075  | exon 8  | 881-882 del  |             | frameshift deletion    |             | rs3215983   | NM_000779    |
| CHRNA7  | 7 | chr15:32157674 | exon 6  | 497-498 del  |             | frameshift deletion    | COSM5002499 | rs374603734 | NM_000746    |
| TMEM254 | 7 | chr10:80081665 | exon 2  | 114 ins A    |             | frameshift insertion   |             | rs113172526 | NM_001270371 |
| FSIP2   | 7 | chr2:185738878 | exon 1  | 252 ins G    |             | frameshift insertion   |             | rs35617283  | NM_173651    |
| ANP32E  | 7 | chr1:150226708 | exon 4  | 453-458 del  | 151-153 del | nonframeshift deletion | COSM4770175 |             | NM_001136478 |
| THAP11  | 7 | chr16:67842921 | exon 1  | 367-369 del  | 123 del     | nonframeshift deletion | COSM1479007 | rs377516180 | NM_020457    |
| ACVR2A  | 7 | chr2:147918575 | exon 7  | A621C        | K207N       | nonsynonymous SNV      | COSM132653  | rs371059184 | NM_001278580 |
| RPS3A   | 7 | chr4:151102986 | exon 4  | A470C        | Q157P       | nonsynonymous SNV      | COSM328158  | rs139979828 | NM_001006    |
| NOTCH1  | 7 | chr9:136518645 | exon 6  | A1045C       | T349P       | nonsynonymous SNV      |             | rs200520088 | NM_017617    |
| PPFIA3  | 7 | chr19:49133149 |         | T>G          |             | splicing variant       | COSM135843  | rs781353888 |              |
| PTEN    | 7 | chr10:87864104 |         | del T        |             | splicing variant       |             | rs71022512  |              |
| MPRIIP  | 7 | chr17:17154305 |         | G>T          |             | splicing variant       |             |             |              |
| OR51F1  | 6 | chr11:4769644  | exon 1  | 274 del      |             | frameshift deletion    |             | rs34672924  | NM_001004752 |
| OR10AD1 | 6 | chr12:48203092 | exon 1  | 200dupT      |             | frameshift insertion   |             | rs144247841 | NM_001004134 |
| ALOX5AP | 6 | chr13:30713841 | exon 1  | 116 ins GTGT |             | frameshift insertion   |             | rs369636483 | NM_001204406 |

|          |   |                |         |               |             |                         |             |             |              |
|----------|---|----------------|---------|---------------|-------------|-------------------------|-------------|-------------|--------------|
| SETB P1  | 6 | chr18:44876699 | exon 4  | 675 ins TCTC  |             | frameshift insertion    |             |             | NM_001130110 |
| PSORS1C1 | 6 | chr6:31138723  | exon 5  | 112 ins C     |             | frameshift insertion    |             | rs138474986 | NM_014068    |
| ZFYVE19  | 6 | chr15:40807701 | exon 1  | 112 ins GGGGC |             | frameshift insertion    |             | rs142730574 | NM_001077268 |
| FAM205C  | 6 | chr9:34893049  | exon 4  | 354-355 CC>G- |             | frameshift substitution |             | rs71506187  | NM_001309426 |
| NUCB2    | 6 | chr11:17330931 | exon 13 | 1203-1205 del | 401-402 del | nonframeshift deletion  | COSM1237695 | rs3842269   | NM_005013    |
| ATN1     | 6 | chr12:6936729  | exon 5  | 1462-1482 del | 488-494 del | nonframeshift deletion  | COSM1476884 |             | NM_001007026 |
| PLEKHA6  | 6 | chr1:204249206 | exon 11 | T1652G        | V551G       | nonsynonymous SNV       |             | rs200961980 | NM_014935    |
| PLXNA2   | 6 | chr1:208098968 | exon 6  | T1609G        | C537G       | nonsynonymous SNV       |             | rs200698765 | NM_025179    |
| L2HGDH   | 6 | chr14:50283981 | exon 5  | T593G         | V198G       | nonsynonymous SNV       |             | rs201692645 | NM_024884    |
| CAPN5    | 6 | chr11:77084981 | exon 2  | T95C          | F32S        | nonsynonymous SNV       | COSM3986477 | rs201256547 | NM_004055    |
| RPS18    | 6 | chr6:33276005  | exon 4  | A230G         | Y77C        | nonsynonymous SNV       | COSM1131899 | rs769838766 | NM_022551    |
| ERVV-1   | 6 | chr19:53014925 | exon 1  | C835G         | P279A       | nonsynonymous SNV       | COSM4132391 | rs140876268 | NM_152473    |
| PDE4DIP  | 6 | chr1:148931920 | exon 3  | G339T         | Q113H       | nonsynonymous SNV       | COSM4593888 | rs3961613   | NM_001002810 |
| PABPC1   | 6 | chr8:100705591 | exon 12 | T1685C        | L562S       | nonsynonymous SNV       |             | rs80006036  | NM_002568    |
| WAS      | 6 | chrX:48685604  | exon 3  | A331C         | T111P       | nonsynonymous SNV       |             |             | NM_000377    |
| NPHP4    | 6 | chr1:5875102   |         | T>A           |             | splicing variant        |             | rs1287637   |              |
| SLC7A13  | 5 | chr8:86214406  | exon 4  | 1413-1511 del |             | frameshift deletion     |             | rs56993779  | NM_138817    |
| PDE4DIP  | 5 | chr1:149010509 | exon 31 | 4994 del      |             | frameshift deletion     |             |             | NM_001198834 |

|          |   |                |         |                  |             |                        |             |             |              |
|----------|---|----------------|---------|------------------|-------------|------------------------|-------------|-------------|--------------|
| LFNG     | 5 | chr7:2513247   | exon 2  | 138-139 ins GATG |             | frameshift insertion   |             | rs34637446  | NM_001166355 |
| WDR73    | 5 | chr15:84643646 | exon 8  | 944-961 del      | 315-321 del | nonframeshift deletion | COSM1375060 | rs11267906  | NM_032856    |
| FOXE1    | 5 | chr9:97854419  | exon 1  | 505-510 del      | 169-170 del | nonframeshift deletion | COSM1724903 | rs71369530  | NM_004473    |
| PAK2     | 5 | chr3:196782706 | exon 2  | C60G             | S20R        | nonsynonymous SNV      | COSM1422033 | rs76714248  | NM_002577    |
| TMTC2    | 5 | chr12:82857341 | exon 2  | C415G            | R139G       | nonsynonymous SNV      | COSM1188560 | rs200268500 | NM_152588    |
| JAG1     | 5 | chr20:10645368 | exon 16 | A2101C           | T701P       | nonsynonymous SNV      |             | rs79176844  | NM_000214    |
| FRMD4A   | 5 | chr10:13657338 | exon 22 | A2251C           | T751P       | nonsynonymous SNV      |             | rs199968440 | NM_018027    |
| KCNJ18   | 5 | chr17:21703568 | exon 3  | G782A            | R261H       | nonsynonymous SNV      |             |             | NM_001194958 |
| TUBB8    | 5 | chr10:47467    | exon 4  | C925T            | R309C       | nonsynonymous SNV      |             | rs782628556 | NM_177987    |
| PANK3    | 5 | chr5:168561512 | exon 5  | G817A            | G273R       | nonsynonymous SNV      |             | rs200317426 | NM_024594    |
| PABPC1   | 5 | chr8:100704992 | exon 13 | G1752A           | M584I       | nonsynonymous SNV      |             | rs112868101 | NM_002568    |
| EIF4EBP1 | 5 | chr8:38057147  | exon 2  | C212T            | P71L        | nonsynonymous SNV      |             |             | NM_004095    |
| WAS      | 5 | chrX:48685610  | exon 3  | T337C            | F113L       | nonsynonymous SNV      |             |             | NM_000377    |
| FLNB     | 5 | chr3:58123679  | exon 21 | T3713A           | I1238K      | nonsynonymous SNV      |             |             | NM_001164317 |
| VPS50    | 5 | chr7:93294638  |         | T>G              |             | splicing variant       |             | rs75893203  |              |
| BCAP31   | 5 | chrX:153724015 |         | C>A              |             | splicing variant       |             | rs184707396 |              |
| TAS2R19  | 5 | chr12:11021672 | exon 1  | A900G            | X300W       | stoploss               |             | rs79475879  | NM_176888    |
| OR6C76   | 4 | chr12:55427175 | exon 1  | 922 del          |             | frameshift deletion    |             | rs397719965 | NM_001005183 |
| SPATA4   | 4 | chr4:176184859 | exon 6  | 836-839 del      |             | frameshift deletion    |             | rs28381989  | NM_144644    |



|          |   |                 |         |               |             |                        |             |             |              |
|----------|---|-----------------|---------|---------------|-------------|------------------------|-------------|-------------|--------------|
| MSH3     | 4 | chr5:80654881   | exon 1  | 154-171 del   | 52-57 del   | nonframeshift deletion | COSM3718906 | rs201874762 | NM_002439    |
| NCL      | 4 | chr2:231460704  | exon 4  | 774-776 del   | 258-259 del | nonframeshift deletion | COSM3736247 | rs139777351 | NM_005381    |
| TSKS     | 4 | chr19:49746676  | exon 6  | 769-786 del   | 257-262 del | nonframeshift deletion | COSM5056834 | rs550916960 | NM_021733    |
| NINL     | 4 | chr20:25476414  | exon 17 | 2872-2877 del | 958-959 del | nonframeshift deletion | COSM1025361 | rs34410422  | NM_025176    |
| CDSN     | 4 | chr6:31117166   | exon 2  | 447-449 del   | 149-150 del | nonframeshift deletion | COSM1077524 | rs34182778  | NM_001264    |
| RNH1     | 4 | chr11:502130    | exon 2  | 19-33 del     | 7-11 del    | nonframeshift deletion | COSM927774  | rs71022920  | NM_203384    |
| POTE E   | 4 | chr2:131263902  | exon 15 | G2447A        | R816H       | nonsynonymous SNV      | COSM3836843 | rs11546936  | NM_001083538 |
| POTEI    | 4 | chr2:130462929  | exon 15 | G3115A        | V1039M      | nonsynonymous SNV      |             | rs4850284   | NM_001277406 |
| MANEAL   | 4 | chr1:37796745   | exon 3  | T662G         | V221G       | nonsynonymous SNV      | COSM4143887 | rs75705909  | NM_001031740 |
| KCNJ18   | 4 | chr17:21703692  | exon 3  | G906T         | M302I       | nonsynonymous SNV      |             |             | NM_001194958 |
| CHD3     | 4 | chr17:7905953   | exon 28 | T4499G        | V1500G      | nonsynonymous SNV      | COSM4130771 | rs201727011 | NM_001005271 |
| CDK11B   | 4 | chr1:1636429    | exon 16 | C1202T        | A401V       | nonsynonymous SNV      |             | rs1059811   | NM_033487    |
| FOXD4L1  | 4 | chr2:113499719  | exon 1  | A463G         | I155V       | nonsynonymous SNV      | COSM224838  | rs199845792 | NM_012184    |
| PABPC3   | 4 | chr13:25096638  | exon 1  | C440T         | T147I       | nonsynonymous SNV      |             | rs78432860  | NM_030979    |
| PABPC1   | 4 | chr8:100704954  | exon 13 | T1790C        | L597P       | nonsynonymous SNV      |             | rs78146983  | NM_002568    |
| DCAF13   | 4 | chr8:103440233  | exon 9  | C1504T        | R502C       | nonsynonymous SNV      | COSM3412622 |             | NM_015420    |
| WNT2B    | 4 | chr1:112516325  | exon 3  | C313T         | R105C       | nonsynonymous SNV      |             | rs762369097 | NM_001291880 |
| TMPRSS13 | 4 | chr11:117909838 | exon 7  | G972T         | Q324H       | nonsynonymous SNV      |             |             | NM_001206789 |

|             |   |                |         |        |            |                       |                 |                     |                      |
|-------------|---|----------------|---------|--------|------------|-----------------------|-----------------|---------------------|----------------------|
| COQ4        | 4 | chr9:128325797 | exon 3  | G221A  | R74Q       | nonsynony<br>mous SNV | COSM5<br>021646 | rs227<br>0203       | NM_00<br>130594<br>2 |
| RABL<br>6   | 4 | chr9:136839820 | exon 13 | G1888A | G630R      | nonsynony<br>mous SNV |                 | rs147<br>12472<br>5 | NM_00<br>117398<br>8 |
| PCDH<br>A5  | 4 | chr5:140822899 | exon 1  | A1124T | D375V      | nonsynony<br>mous SNV |                 | rs139<br>24549<br>6 | NM_01<br>8908        |
| PCDH<br>GA5 | 4 | chr5:141365274 | exon 1  | A944G  | Y315C      | nonsynony<br>mous SNV |                 | rs199<br>51270<br>8 | NM_01<br>8918        |
| RBSN        | 4 | chr3:15090399  | exon 4  | G289T  | G97C       | nonsynony<br>mous SNV |                 |                     | NM_00<br>130237<br>8 |
| RNF1<br>75  | 4 | chr4:153715537 | exon 7  | T756G  | C252W      | nonsynony<br>mous SNV |                 | rs142<br>22430<br>6 | NM_17<br>3662        |
| EZR         | 4 | chr6:158787182 | exon 3  | C118T  | R40W       | nonsynony<br>mous SNV |                 | rs772<br>60842<br>8 | NM_00<br>3379        |
| SLC22<br>A1 | 4 | chr6:160122197 | exon 1  | T262C  | C88R       | nonsynony<br>mous SNV | COSM3<br>928207 | rs559<br>18055      | NM_00<br>3057        |
| SCN7<br>A   | 4 | chr2:166405764 | exon 25 | G4865A | R1622<br>Q | nonsynony<br>mous SNV |                 | rs188<br>78193<br>5 | NM_00<br>2976        |
| ALDH<br>4A1 | 4 | chr1:18883153  | exon 7  | G469A  | G157S      | nonsynony<br>mous SNV |                 | rs780<br>29802<br>7 | NM_00<br>116150<br>4 |
| GATA<br>D2A | 4 | chr19:19492680 | exon 3  | A502G  | S168G      | nonsynony<br>mous SNV |                 | rs779<br>97146<br>3 | NM_00<br>130094<br>6 |
| NTHL<br>1   | 4 | chr16:2040195  | exon 5  | G753C  | W251C      | nonsynony<br>mous SNV |                 |                     | NM_00<br>2528        |
| GJC2        | 4 | chr1:228158846 | exon 2  | C1088T | A363V      | nonsynony<br>mous SNV |                 |                     | NM_02<br>0435        |
| CHRN<br>D   | 4 | chr2:232531450 | exon 6  | C337T  | P113S      | nonsynony<br>mous SNV |                 | rs142<br>06332<br>8 | NM_00<br>131119<br>5 |
| PYGB        | 4 | chr20:25292528 | exon 17 | G2092A | V698M      | nonsynony<br>mous SNV |                 | rs150<br>58250<br>2 | NM_00<br>2862        |
| DMD         | 4 | chrX:31203978  | exon 6  | C586T  | R196W      | nonsynony<br>mous SNV |                 | rs373<br>44800<br>2 | NM_00<br>4015        |
| DMD         | 4 | chrX:32699119  | exon 8  | C800T  | S267F      | nonsynony<br>mous SNV |                 |                     | NM_00<br>0109        |
| SCUB<br>E3  | 4 | chr6:35239766  | exon 8  | C841T  | R281C      | nonsynony<br>mous SNV | COSM1<br>265091 | rs201<br>95255<br>4 | NM_00<br>130313<br>6 |

|           |   |                |         |                     |           |                   |             |             |              |
|-----------|---|----------------|---------|---------------------|-----------|-------------------|-------------|-------------|--------------|
| COL9A2    | 4 | chr1:40314260  | exon 4  | A194G               | K65R      | nonsynonymous SNV |             | rs756634659 | NM_001852    |
| SPTBN5    | 4 | chr15:41887281 | exon 6  | G820A               | V274I     | nonsynonymous SNV |             | rs55830029  | NM_016642    |
| CYP4A11   | 4 | chr1:46936786  | exon 4  | G388A               | G130S     | nonsynonymous SNV |             | rs62621075  | NM_000778    |
| SKOR2     | 4 | chr18:47248873 | exon 1  | G311A               | R104H     | nonsynonymous SNV | COSM4595039 | rs574685057 | NM_001037802 |
| GNG2      | 4 | chr14:51966613 | exon 3  | G142T               | D48Y      | nonsynonymous SNV | COSM1629335 |             | NM_001243774 |
| DNAH1     | 4 | chr3:52353415  | exon 20 | A3262T              | I1088F    | nonsynonymous SNV |             |             | NM_015512    |
| ITIH3     | 4 | chr3:52799805  | exon 9  | T959C               | L320P     | nonsynonymous SNV |             |             | NM_002217    |
| SOX17     | 4 | chr8:54458151  | exon 1  | G13C                | D5H       | nonsynonymous SNV |             |             | NM_022454    |
| SOX17     | 4 | chr8:54459282  | exon 2  | G532T               | G178C     | nonsynonymous SNV |             | rs267607082 | NM_022454    |
| TRIM6     | 4 | chr11:5611169  | exon 6  | C769T               | R257C     | nonsynonymous SNV | COSM429249  |             | NM_001198645 |
| PHF3      | 4 | chr6:63691742  | exon 4  | T2195C              | M732T     | nonsynonymous SNV |             |             | NM_015153    |
| MAP3K11   | 4 | chr11:65607491 | exon 5  | A1268G              | E423G     | nonsynonymous SNV |             |             | NM_002419    |
| CLDN3     | 4 | chr7:73769649  | exon 1  | C401T               | P134L     | nonsynonymous SNV |             | rs139191328 | NM_001306    |
| GOLGA6L10 | 4 | chr15:82344664 | exon 6  | T1196C              | L399P     | nonsynonymous SNV |             | rs773315719 | NM_001164465 |
| FNBP1L    | 4 | chr1:93551055  | exon 14 | G1586C              | G529A     | nonsynonymous SNV |             |             | NM_001024948 |
| SLC26A1   | 4 | chr4:989077    | exon 3  | T1862A              | F621Y     | nonsynonymous SNV |             |             | NM_022042    |
| ZFP64     | 4 | chr20:52164759 |         | ins AA              |           | splicing variant  |             | rs200059978 |              |
| MTC2      | 4 | chr11:47622719 | exon 11 | G780A               | W260X     | stopgain          |             | rs796096347 | NM_001317232 |
| RETNLB    | 4 | chr3:108757146 | exon 1  | 39 ins TAATCCC<br>C | L14 ins X | stopgain          |             | rs368497660 | NM_032579    |
| KCNQ2     | 4 | chr20:63407011 | exon 15 | C2168A              | S723X     | stopgain          |             |             | NM_004518    |

|         |   |                 |         |               |               |                        |             |             |              |
|---------|---|-----------------|---------|---------------|---------------|------------------------|-------------|-------------|--------------|
| TYRO3   | 3 | chr15:41571117  | exon 13 | 1659-1660 del |               | frameshift deletion    |             |             | NM_006293    |
| OR5B3   | 3 | chr11:58403320  | exon 1  | 90 del        |               | frameshift deletion    |             | rs200799158 | NM_001005469 |
| GRP     | 3 | chr18:59230436  | exon 3  | 394-397 del   |               | frameshift deletion    |             | rs149962068 | NM_001012512 |
| SETBP1  | 3 | chr18:44876700  | exon 4  | 676-677 del   |               | frameshift deletion    |             |             | NM_001130110 |
| AP3S1   | 3 | chr5:115866721  | exon 2  | 121-124 del   |               | frameshift deletion    | COSM1319295 | rs80118146  | NM_001284    |
| PEBP4   | 3 | chr8:22713395   | exon 7  | 659 del       |               | frameshift deletion    |             | rs35121552  | NM_144962    |
| CNTNAP3 | 3 | chr9:39149858   | exon 10 | 1597 del      |               | frameshift deletion    |             |             | NM_003655    |
| DSPP    | 3 | chr4:87615750   | exon 5  | 3088-3105 del | 1030-1035 del | nonframeshift deletion | COSM5547737 | rs773557330 | NM_0014208   |
| CTBS    | 3 | chr1:84574316   | exon 1  | 92-100 del    | 31-34 del     | nonframeshift deletion | COSM1290235 | rs142534762 | NM_004388    |
| FAM109A | 3 | chr12:111363023 | exon 3  | 397-405 del   | 133-135 del   | nonframeshift deletion | COSM430328  | rs139032867 | NM_001177997 |
| DSPP    | 3 | chr4:87615391   | exon 5  | 2729-2737 del | 910-913 del   | nonframeshift deletion | COSM4603772 | rs111456637 | NM_0014208   |
| NPIP6   | 3 | chr16:28343070  | exon 7  | 813-815 del   | 271-272 del   | nonframeshift deletion | COSM5215813 | rs374692588 | NM_001282524 |
| TRAK1   | 3 | chr3:42210086   | exon 13 | 1842-1844 del | 614-615 del   | nonframeshift deletion | COSM308433  | rs753440774 | NM_001265609 |
| HRCT1   | 3 | chr9:35906351   | exon 1  | 64-66 del     | 22 del        | nonframeshift deletion | COSM1490012 | rs370606246 | NM_001039792 |
| PAK2    | 3 | chr3:196803111  | exon 4  | A383G         | K128R         | nonsynonymous SNV      | COSM1717568 | rs78043821  | NM_0012577   |
| ZBTB4   | 3 | chr17:7465792   | exon 3  | A1010C        | Y337S         | nonsynonymous SNV      |             | rs201264238 | NM_001128833 |
| AK2     | 3 | chr1:33013299   | exon 6  | A578T         | Y193F         | nonsynonymous SNV      |             | rs113711467 | NM_001199199 |
| KCNJ18  | 3 | chr17:21703651  | exon 3  | G865C         | E289Q         | nonsynonymous SNV      |             |             | NM_001194958 |
| PRSS3   | 3 | chr9:33795599   | exon 1  | T26C          | F9S           | nonsynonymous SNV      |             |             | NM_0012771   |

|          |   |                |         |        |        |                   |             |             |              |
|----------|---|----------------|---------|--------|--------|-------------------|-------------|-------------|--------------|
| CACNA1G  | 3 | chr17:50615426 | exon 25 | A4723C | T1575P | nonsynonymous SNV |             | rs200825775 | NM_198376    |
| CHRN B2  | 3 | chr1:154569495 | exon 2  | T98G   | V33G   | nonsynonymous SNV | COSM3726999 | rs200729328 | NM_000748    |
| LDLR AD3 | 3 | chr11:36227304 | exon 4  | A527C  | H176P  | nonsynonymous SNV | COSM1285901 | rs750896925 | NM_001304263 |
| SLIT3    | 3 | chr5:168685818 | exon 31 | A3445C | T1149P | nonsynonymous SNV |             | rs201386396 | NM_001271946 |
| TFAM     | 3 | chr10:58388704 | exon 4  | T326G  | V109G  | nonsynonymous SNV | COSM5034010 | rs77418790  | NM_001270782 |
| CNTNAP3  | 3 | chr9:39078875  | exon 22 | G3488A | G1163D | nonsynonymous SNV |             | rs751578196 | NM_033655    |
| RBMX     | 3 | chrX:136875541 | exon 6  | A586G  | R196G  | nonsynonymous SNV |             | rs139954333 | NM_002139    |
| PA2G4    | 3 | chr12:56106718 |         | ins A  |        | splicing variant  |             | rs34728522  |              |
| SLC3A1   | 3 | chr2:44301129  |         | del T  |        | splicing variant  |             | rs61179824  |              |
| LRRC37A3 | 3 | chr17:64858885 |         | ins A  |        | splicing variant  |             | rs540207138 |              |
| IQCK     | 3 | chr16:19717694 |         | G>C    |        | splicing variant  |             | rs4782272   |              |
| PIBF1    | 3 | chr13:72835370 |         | ins A  |        | splicing variant  |             | rs200683940 |              |
| CSF1     | 3 | chr1:109924191 |         | G>T    |        | splicing variant  |             |             |              |
| PKD2L2   | 3 | chr5:137936318 |         | A>G    |        | splicing variant  |             |             |              |
| MAD1L1   | 3 | chr7:2014501   |         | C>A    |        | splicing variant  |             |             |              |
| PAIP1    | 3 | chr5:43538923  |         | C>T    |        | splicing variant  |             |             |              |
| DGKZ     | 3 | chr11:46378989 |         | A>C    |        | splicing variant  |             |             |              |
| PIGQ     | 3 | chr16:582881   |         | A>T    |        | splicing variant  |             |             |              |
| DOCK8    | 3 | chr9:463655    | exon 45 | C5907A | Y1969X | stopgain          | COSM3982891 | rs79568455  | NM_001190458 |
| NP1PB15  | 3 | chr16:74391889 | exon 7  | G1141T | E381X  | stopgain          | COSM4592878 | rs375776693 | NM_001306094 |

|           |   |                    |           |       |      |          |  |  |               |
|-----------|---|--------------------|-----------|-------|------|----------|--|--|---------------|
| BAGE<br>4 | 3 | chr21:10<br>414915 | exon<br>2 | A120C | X40C | stoploss |  |  | NM_18<br>1704 |
|-----------|---|--------------------|-----------|-------|------|----------|--|--|---------------|

**Supplementary Table S6:** Detailed list of variants found in at least 10% of the WES patient cohort.  
Ntde = nucleotide, aa = amino acid

| Gene   | Mutation (Amino Acid change)                                            | Number of patients presenting with mutation |
|--------|-------------------------------------------------------------------------|---------------------------------------------|
| NOTCH1 | T311P                                                                   | 6                                           |
|        | T349P                                                                   | 3                                           |
|        | H1190P                                                                  | 1                                           |
|        | G1503S                                                                  | 1                                           |
| CTBP2  | T731R                                                                   | 2                                           |
|        | G813S                                                                   | 1                                           |
| TP53   | R141C                                                                   | 2                                           |
|        | C44F                                                                    | 1                                           |
| ACTR2  | A264V                                                                   | 2                                           |
| LFNG   | Insertion of 4 nucleotides leading to a frameshift after amino acid 46  | 5                                           |
| JAG1   | T701P                                                                   | 5                                           |
| NOTCH3 | C864F                                                                   | 2                                           |
| MAML3  | Deletion of 11 nucleotides leading to a frameshift after amino acid 505 | 2                                           |
| NCSTN  | T476M                                                                   | 2                                           |
| DLL3   | C4553R                                                                  | 2                                           |
| WNT2B  | R105C                                                                   | 4                                           |

**Supplementary Table S8:** Details of the mutations detected in the Notch1 pathway by GSEA

|             | All patients |                           | Adult patients |                           | Paediatric patients |                           | ALK+ ALCL patients |                           | ALK- ALCL patients |                           |
|-------------|--------------|---------------------------|----------------|---------------------------|---------------------|---------------------------|--------------------|---------------------------|--------------------|---------------------------|
|             | WT NOTCH1    | NOTCH1 T349P and/or T311P | WT NOTCH1      | NOTCH1 T349P and/or T311P | WT NOTCH1           | NOTCH1 T349P and/or T311P | WT NOTCH1          | NOTCH1 T349P and/or T311P | WT NOTCH1          | NOTCH1 T349P and/or T311P |
| # Patients  | n = 57       | n = 11                    | n = 13         | n = 3                     | n = 27              | n = 5                     | n = 45             | n = 8                     | n = 12             | n = 3                     |
| OS (years)  | 4.4          | 3.6                       | 4.2            | 1.7                       | 4.4                 | 2.9                       | 4.5                | 4.3                       | 4.5                | 1.7                       |
| EFS (years) | 2.6          | 2.1                       | 4              | 1.7                       | 4.2                 | 3.2                       | 2.3                | 2.2                       | 3.6                | 1.7                       |
| Death (%)   | 25%          | 36%                       | 38%            | 67%                       | 26%                 | 20%                       | 18%                | 25%                       | 50%                | 67%                       |
| Relapse (%) | 61%          | 55%                       | 38%            | 0%                        | 52%                 | 60%                       | 67%                | 75%                       | 42%                | 0%                        |

**Supplemental Table S9: Clinical data pertaining to the validation cohort.** Data is based on 5-years of follow-up. Similarly, the average OS (Overall Survival) and EFS (Event-Free Survival) is based on a maximum of 5 years follow-up. Adult patients are defined as being older than 18 years of age.



| Name       | Direction | Application               | Sequence                    |
|------------|-----------|---------------------------|-----------------------------|
| NOTCH1     | Forward   | Sanger validation         | CTCTGCCTGGCGCTGCTG          |
| NOTCH1     | Reverse   | Sanger validation         | GGAAACAACACTGCAAGAACGGG     |
| U6         | Forward   | Sanger sequencing         | AATGACTATCATATGCTTACCG      |
| H1_TET     | Forward   | Sanger sequencing         | TCGCTATGTGTTCTGGGAAA        |
| CMV_F      | Forward   | Sanger sequencing         | CGCAAATGGGCGGTAGGCGTG       |
| SP6        | Forward   | Sanger sequencing         | CGATTTAGGTGACACTATAG        |
| NOTCH1     | Forward   | qPCR                      | TACAAGTGC GACTGTGACCC       |
| NOTCH1     | Reverse   | qPCR                      | ATACACGTGCCCTGGTTCAG        |
| HEY1       | Forward   | qPCR                      | GTTCCGGCTCTAGGTTCCATGT      |
| HEY1       | Reverse   | qPCR                      | CGTCGGCGCTTCTAATTATTC       |
| HES1       | Forward   | qPCR                      | TCAACACGACACCCGGATAAAC      |
| HES1       | Reverse   | qPCR                      | GCCGCGAGCTATCTTTCTTCA       |
| GAPDH      | Forward   | qPCR                      | CTGGGCTACACTGAGCACC         |
| GAPDH      | Reverse   | qPCR                      | AAGTGGTCGTTGAGGGCAATG       |
| PPIA       | Forward   | qPCR                      | GCTTTGGGTCCAGGAATG          |
| PPIA       | Reverse   | qPCR                      | AGAAGGAATGATCTGGTGGTTAAG    |
| DLL1       | Forward   | qPCR                      | GATTCTCCTGATGACCTCGCA       |
| DLL1       | Reverse   | qPCR                      | TCCGTAGTAGTGTTCGTCACA       |
| MYC        | Forward   | qPCR                      | GGCTCCTGGCAAAGGTCA          |
| MYC        | Reverse   | qPCR                      | CTGCGTAGTTGTGCTGATGT        |
| DTX1       | Forward   | qPCR                      | GACGGCTACGATATGGACAT        |
| DTX1       | Reverse   | qPCR                      | CCTAGCGATGAGAGGTCGAG        |
| STAT3      | Forward   | qPCR                      | CAGCAGCTTGACACACGGTA        |
| STAT3      | Reverse   | qPCR                      | AAACACCAAAGTGGCATGTGA       |
| NOTCH1_349 | Forward   | Site-Directed Mutagenesis | GGTCATGGCAGGGGCGCCGTGGAA    |
| NOTCH1_349 | Reverse   | Site-Directed Mutagenesis | TTCCACGGCGCCCCTGCCATGACC    |
| NOTCH1_311 | Forward   | Site-Directed Mutagenesis | GTGTTGTGGCAGGGCCCGCTTCTGG   |
| NOTCH1_311 | Reverse   | Site-Directed Mutagenesis | CCAGAACGGCGGGCCCTGCCACAACAC |
| NOTCH1     | Forward   | ChIP                      | ATCAACCTGTTCTCCCTG          |
| NOTCH1     | Reverse   | ChIP                      | TTCCC GACTACAAGCGGACT       |
| IRF4       | Forward   | ChIP                      | CTCTAAACACCGCGGAGAGG        |
| IRF4       | Reverse   | ChIP                      | CTTTGCAGAGCGTGTAAACGG       |
| Control    | Forward   | ChIP                      | ATTCCACCTTGTCAGCCCT         |
| Control    | Reverse   | ChIP                      | GGTTTTATCCCTCTCCCCGAC       |

**Supplementary Table S10:** Detailed list of oligos used in this study.

| Cell line  | Tissue of origin      | Cell of origin      | Sex    | Karyotype     | Species | Growth Medium           | Doubling time | Growth Mode | Ref |
|------------|-----------------------|---------------------|--------|---------------|---------|-------------------------|---------------|-------------|-----|
| HEK293FT   | Kidney (foetal)       | Epithelial          | Female | Hypotriploid  | Human   | DMEM + 10% FBS          | 20 hrs        | Adherent    | 38  |
| Karpas 299 | Lymph node            | ALK+ ALCL           | Male   | Hypodiploid   | Human   | RPMI 1640 + 10% FBS     | 30 hrs        | Suspension  | 39  |
| SU-DHL1    | Lymph node            | ALK+ ALCL           | Male   | Octoploid     | Human   | RPMI 1640 + 10% FBS     | 45 hrs        | Suspension  | 40  |
| SUP-M2     | Lymph node            | ALK+ ALCL           | Female | Near-Diploid  | Human   | RPMI 1640 + 10% FBS     | 45 hrs        | Suspension  | 41  |
| DEL        | Lymph node            | ALK+ ALCL           | Male   | Hyper-diploid | Human   | RPMI 1640 + 10% FBS     | 35 hrs        | Suspension  | 42  |
| MAC2A      | Metastatic lymph node | ALK- ALCL           | Male   | Near-Diploid  | Human   | RPMI 1640 + 10% FBS     | 50 hrs        | Suspension  | 43  |
| FEPD       | Peripheral Blood      | ALK- ALCL           | Female | Unknown       | Human   | RPMI 1640 + 10% FBS     | 50 hrs        | Suspension  | 44  |
| OP9        | Bone Marrow           | Embryonic stem cell | ?      | Unknown       | Mouse   | $\alpha$ -MEM + 20% FBS | 26 hrs        | Adherent    | 45  |

Supplementary Table S11: Cell line description

| Plasmid                                                          | Reference                                                                             | Selection antibiotic |
|------------------------------------------------------------------|---------------------------------------------------------------------------------------|----------------------|
| psPAX2                                                           | Addgene; Cat# 12260                                                                   | -                    |
| PMD2.G                                                           | Addgene; Cat# 12259                                                                   | -                    |
| pLJM1-EGFP-NOTCH1                                                | -                                                                                     | Puromycin            |
| MISSION® shRNA for NOTCH1                                        | Sigma-Aldrich, Cat# SHCLNG-NM_017617 (TRCN0000003362, TRCN0000350253, TRCN0000350254) | Puromycin            |
| MISSION® shRNA for STAT3                                         | Sigma-Aldrich, Cat# SHCLNG-NM_003150 (TRCN0000020840, TRCN0000020842)                 | Puromycin            |
| pLVTHM vector containing the H1 promoter ALK-shRNA (A5) cassette | Piva <i>et al.</i> , 2006                                                             | Puromycin            |

**Supplementary Table S12:** Detailed list of plasmids used in this study
